# Supplementary material for: Genetic information from discordant sibling pairs points to ESRP2 as a candidate trans-acting regulator of the CF modifier gene SCNN1B
Source: PubMed Central journal article supplement (PMC7775467; doi:10.1038/s41598-020-79804-y), 2020-12-31
Supplement: 41598_2020_79804_MOESM2_ESM.pdf [file 41598_2020_79804_MOESM2_ESM.pdf]

**Supporting information for:**

**Genetic information from discordant sibling pairs points to ESRP2 as a candidate trans-acting regulator of the CF modifier gene SCNN1B**

Tim Becker, Andreas Pich, Stephanie Tamm, Silke Hedtfeld, Mohammed Ibrahim, Janine Altmüller, Nina Dalibor, Mohammad Toliat, Sabina Janciauskiene, Burkhard Tümmler, Frauke Stanke

----- [Source data for Figure 6](#) -----

# Source data EMSA / Figure 6A,B

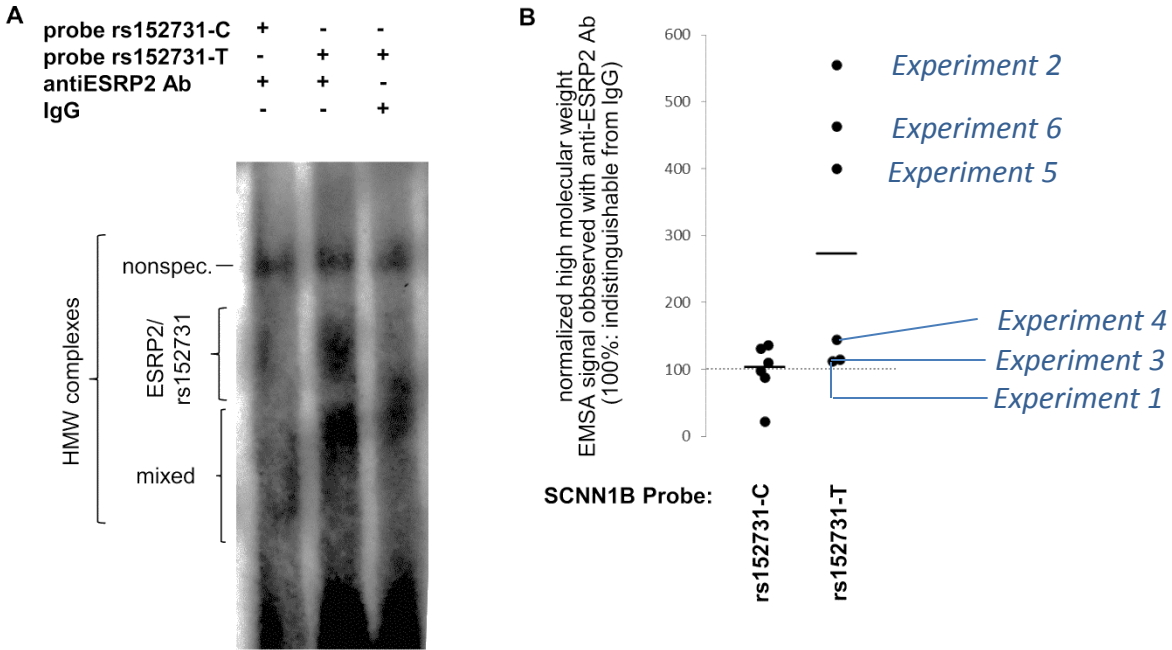

*Raw data 6A is from: Experiment 6.*

*Nuclear extracts used in experiment have been freshly prepared for each experiment.*

*Dokumentation of primary data (GLP rules, Hannover medical school):*

- Experiment 1: Lab Book 6296, pages 46-49*
- Experiment 2: Lab Book 6296, pages 51-54*
- Experiment 3: Lab Book 6296, page 61*
- Experiment 4: Lab Book 6296, page 65*
- Experiment 5: Lab Book 6292, page 202 -205*
- Experiment 6: Lab Book 6292, page 206 - 210*

# Source data EMSA / Figure 6A,B – *technical variables*

*Technical variables between experiments:*

## A. Source of nuclear extracts

Experiment 1: 16HBE14o-, derived from frozen cells

Experiment 2: 16HBE14o-, derived from frozen cells

Experiment 3: T84, derived from frozen cells

Experiment 4: 16HBE14o-, derived from frozen cells

Experiment 5: 16HBE14o-, derived from freshly cultured cells

Experiment 6: 16HBE14o-, derived from freshly cultured cells

## B. Electrophoresis conditions

Experiment 1: 6% polyacrylamide; 250 V, 2,5 h

Experiment 2: 5% polyacrylamide; 40 V, 15 h

Experiment 3: 5% polyacrylamide; 250 V, 2,5 h

Experiment 4: 5% polyacrylamide; 300 V, 2 h

Experiment 5: 5% polyacrylamide; 16 h 40 V + 1,5 h, 100 V

Experiment 6: 5% polyacrylamide; 16 h 40 V + 1,5 h, 100 V

*Influence of electrophoresis conditions on detection of ESRP2 / rs152731-T complexes by EMSA:*

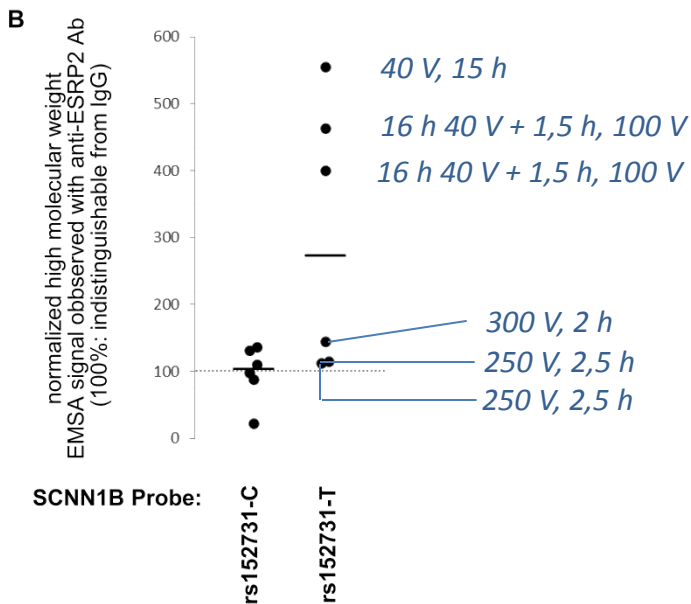

## Source data EMSA / Figure 6A,B – *evaluation of lane profiles*

A. *intensity distribution in the lane with anti-ESRP2-Ab is similar to the intensity distribution in the corresponding lane with IgG*

a. *profile shows one broad signal with one intensity maximum*

- *the same high molecular weight area between lanes is compared*
- *the position of the band is defined based on the signal observed with anti-ESRP2-Ab and the same area is evaluated for the corresponding IgG lane*
- ***Interpretation: specific and unspecific complexes have not been separated by electrophoresis***
- Experiments 1, 3

b. *profile shows more than one intensity maximum*

- *position of subbands is defined based on the signals observed with anti-ESRP2-Ab and the same areas are evaluated for the corresponding IgG lane*
- ***Interpretation: specific and unspecific complexes have been partially separated by electrophoresis***
- Experiments 2, 4

B. *intensity distribution in lane with anti-ESRP2-Ab shows a signal that is absent from the corresponding IgG lane*

- *position of the band is defined for the lane with the anti-ESRP2-Ab and the same area is evaluated for the corresponding IgG lane*
- ***Interpretation: specific and unspecific complexes have been separated by electrophoresis***
- Experiments 5,6

# Source data EMSA / *Experiment 1 – uncurated data*

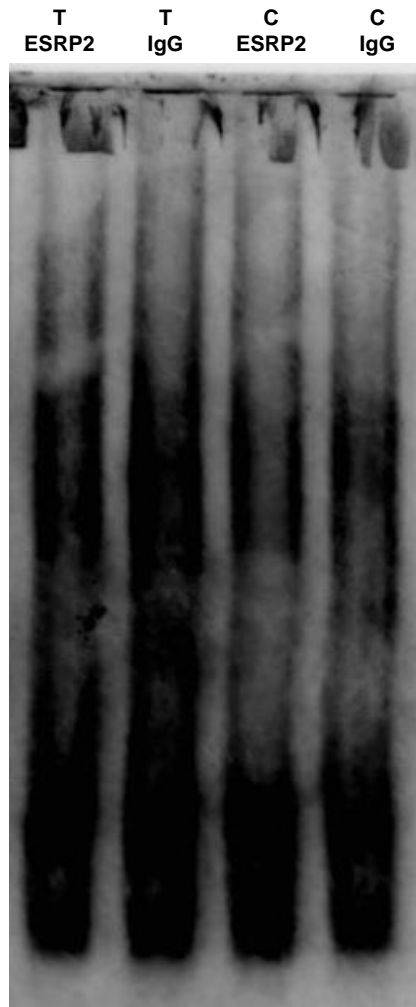

*raw data*

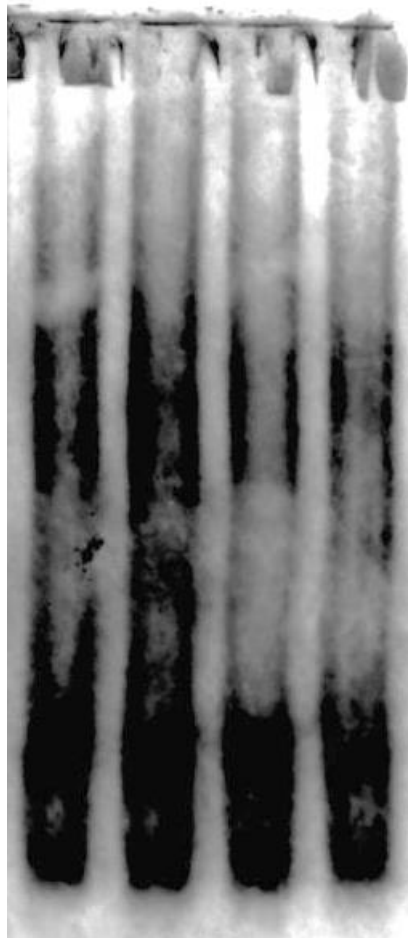

*brightness and contrast adjusted  
for visualisation on screen*

## **Legend:**

EMSA Probe (rs152731 allele C or rs152731 allele T)  
Ab (ESRP2 = anti-ESRP2-Ab; IgG = isotype control)

# Source data EMSA / Experiment 1 – lane profiles

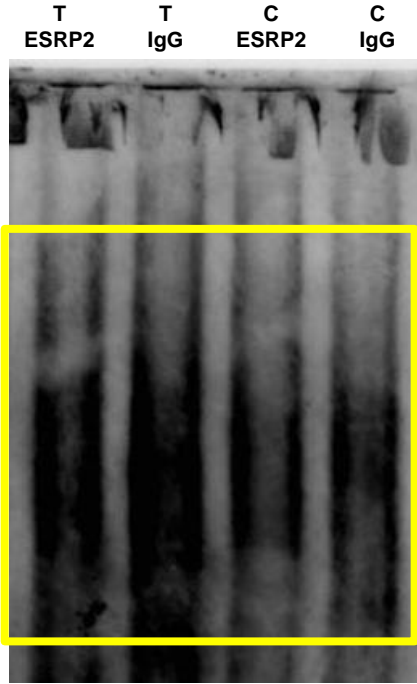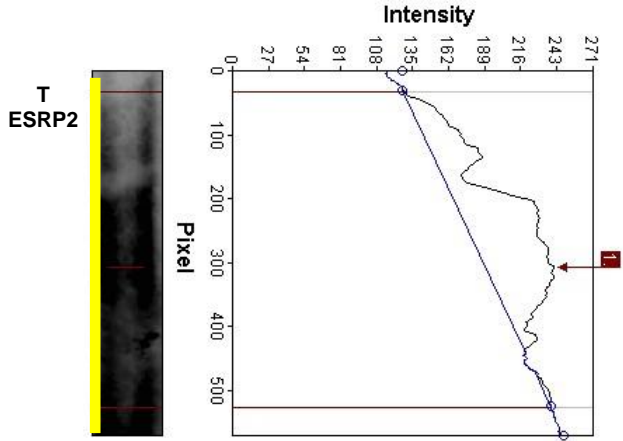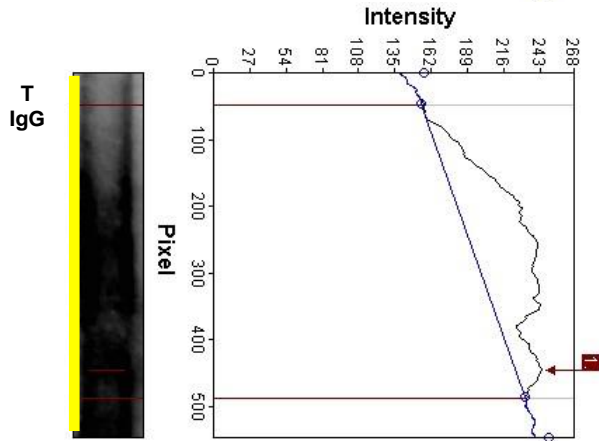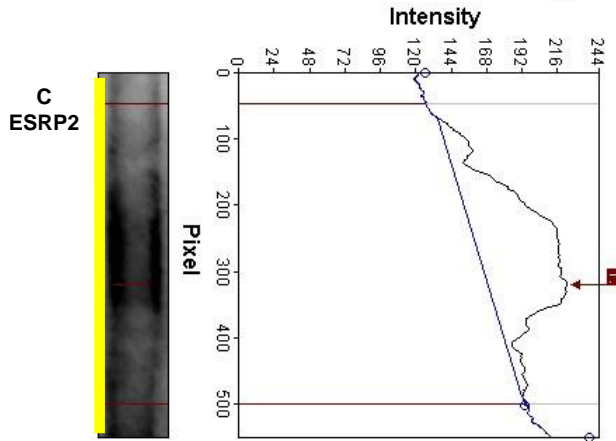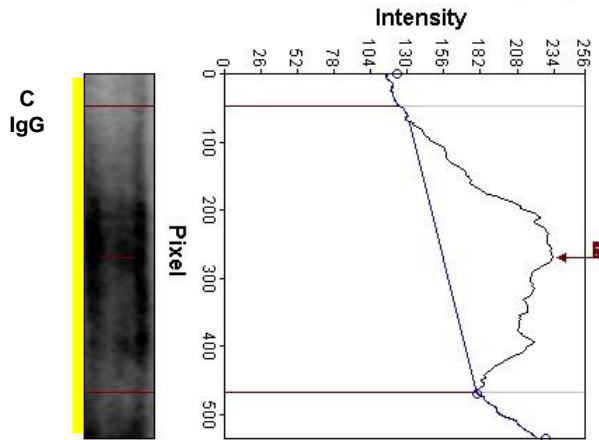

# Source data EMSA / Experiment 1 –densitometry

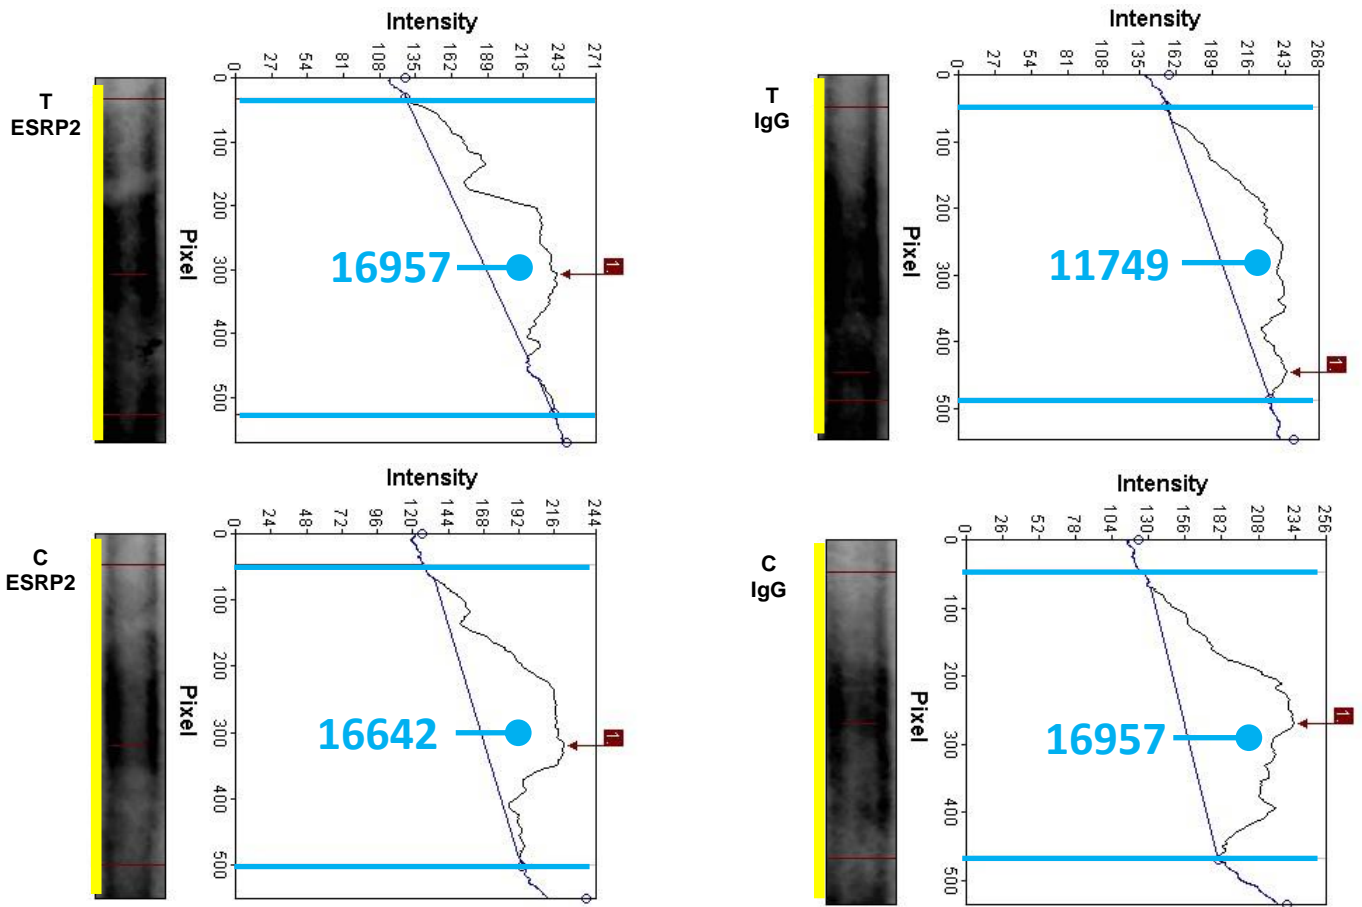

Raw volume was used to estimate ESRP2 bound on EMSA probes rs152731-T and rs152731-C. Signal intensity of the corresponding IgG lane was normalized to 100%:

|            | anti-ESRP2-Ab | IgG  |
|------------|---------------|------|
| rs152731-T | 144%          | 100% |
| rs152731-C | 98%           | 100% |

# Source data EMSA / *Experiment 2 – uncurated data*

C C T T  
IgG ESRP2 IgG ESRP2

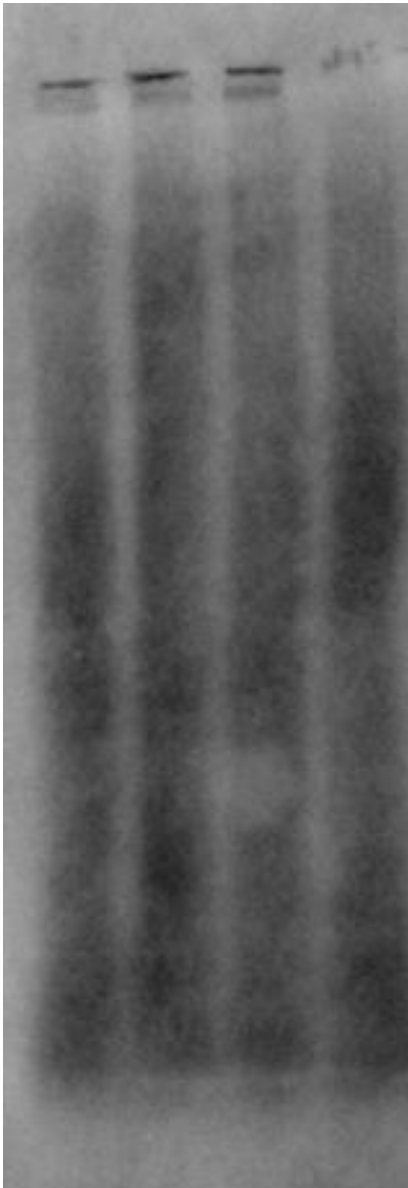

*raw data*

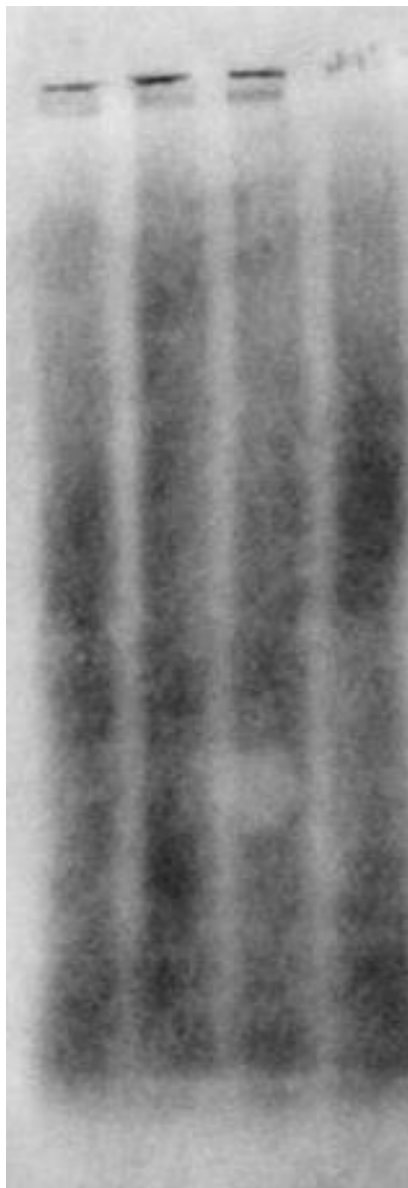

*brightness and contrast adjusted  
for visualisation on screen*

## **Legend:**

EMSA Probe (rs152731 allele C or rs152731 allele T)  
Ab (ESRP2 = anti-ESRP2-Ab; IgG = isotype control)



# Source data EMSA / Experiment 2 – lane profiles

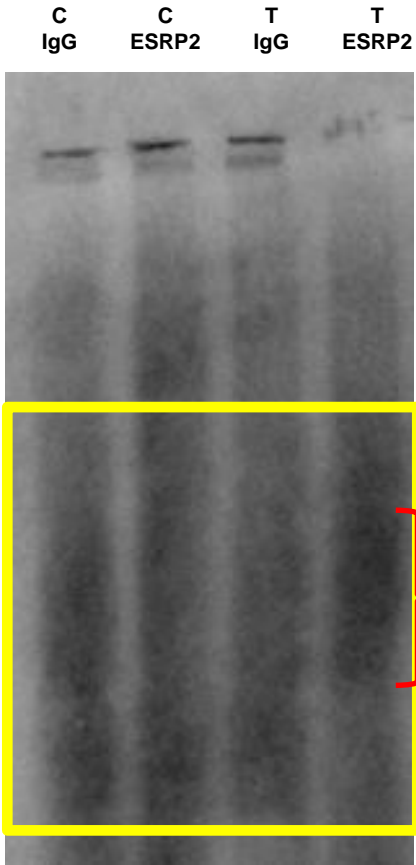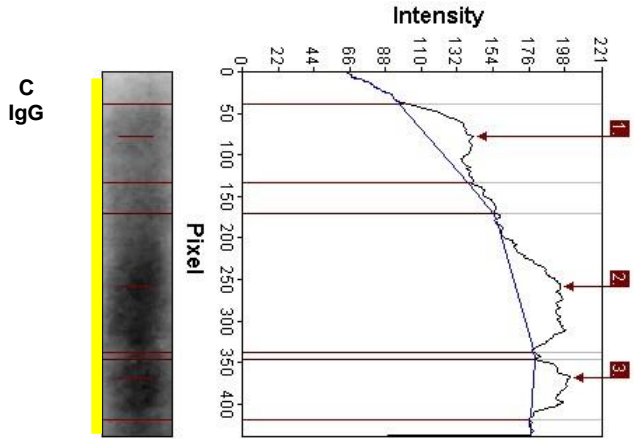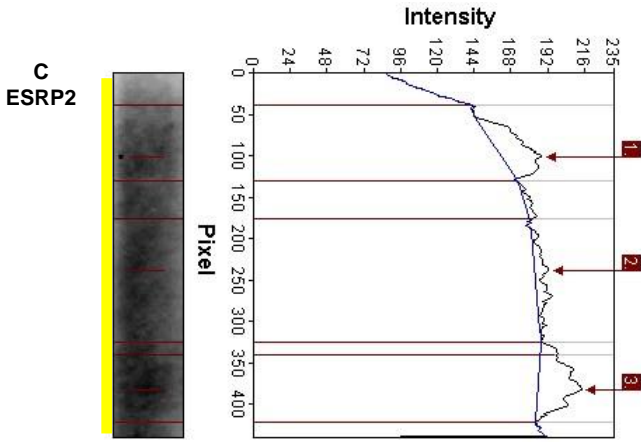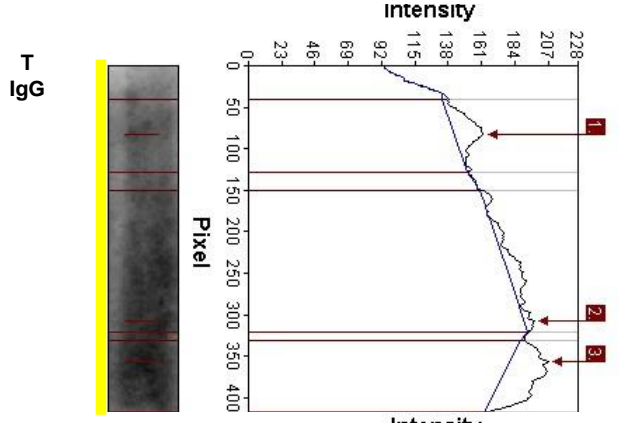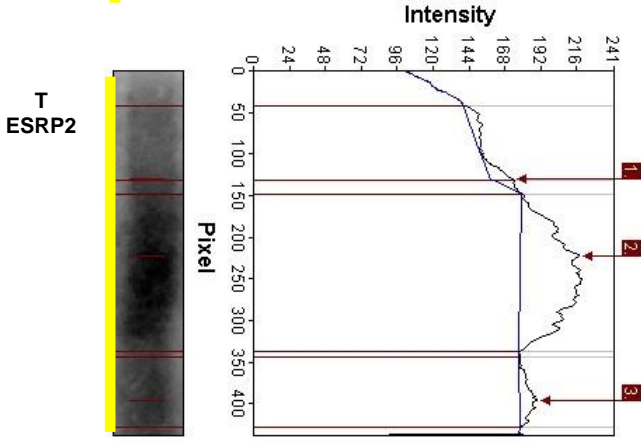

present in T ESRP2 but absent in T IgG

# Source data EMSA / Experiment 2 – densitometry

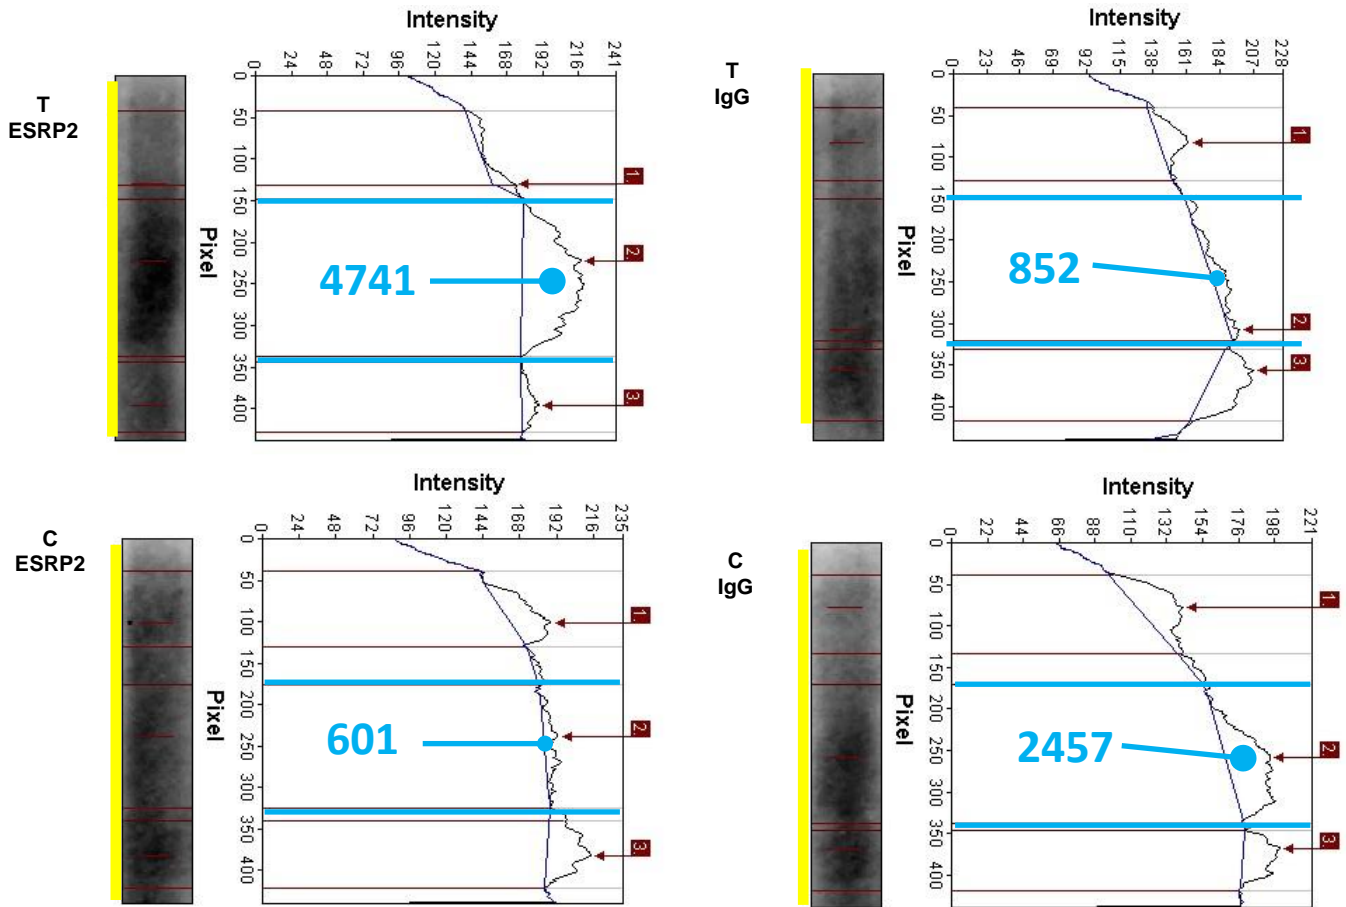

Raw volume was used to estimate ESRP2 bound on EMSA probes rs152731-T and rs152731-C. Signal intensity of the corresponding IgG lane was normalized to 100%:

|            | anti-ESRP2-Ab | IgG  |
|------------|---------------|------|
| rs152731-T | 556%          | 100% |
| rs152731-C | 24%           | 100% |

# Source data EMSA / *Experiment 3 – uncurated data*

T T C C  
ESRP2 IgG ESRP2 IgG

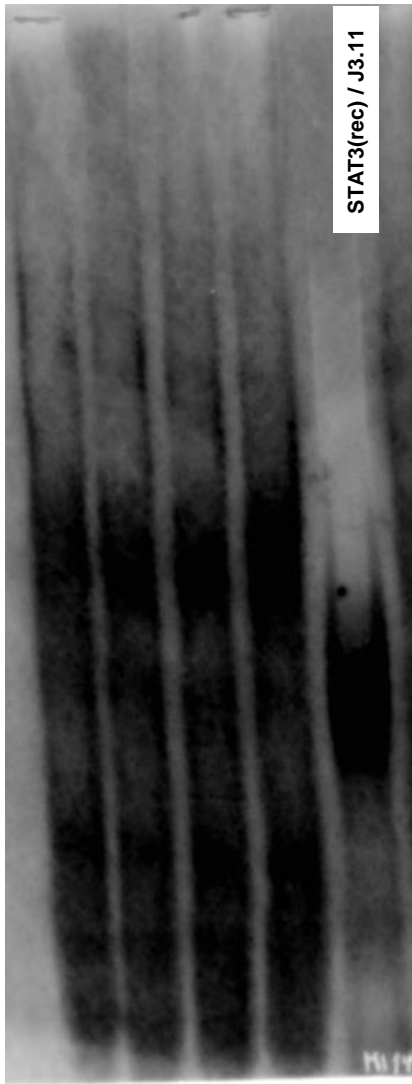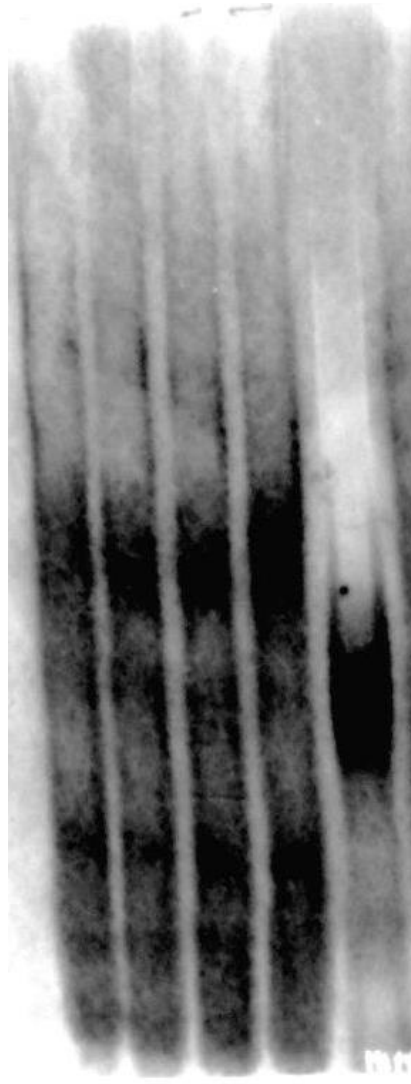

## Legend:

EMSA Probe (rs152731 allele C or rs152731 allele T)

Ab (ESRP2 = anti-ESRP2-Ab; IgG = isotype control)

STAT3(rec) / J3.11: STAT3 recombinant protein & probe J3.11 (unrelated to ENaC/ESRP2)

# Source data EMSA / Experiment 3 – lane profiles

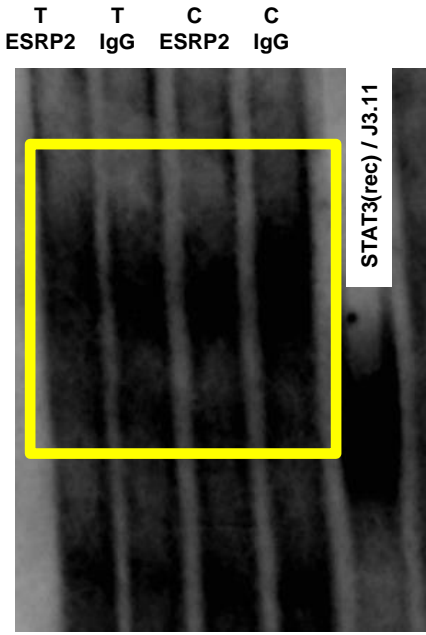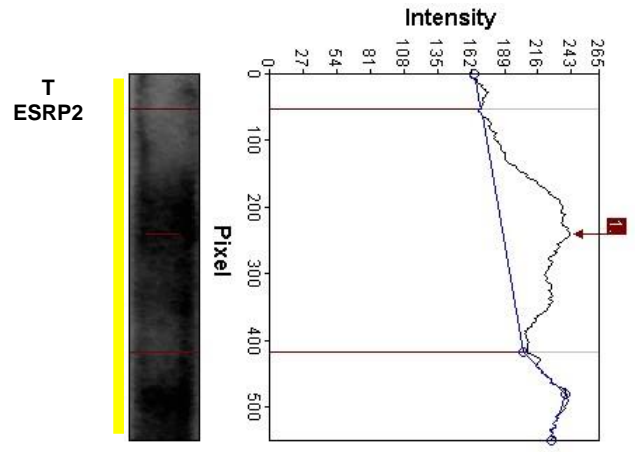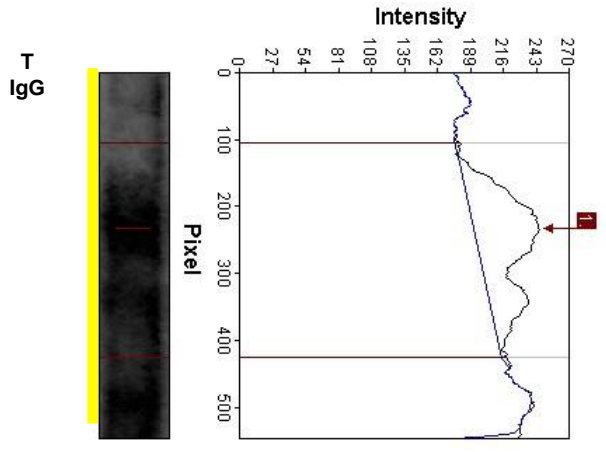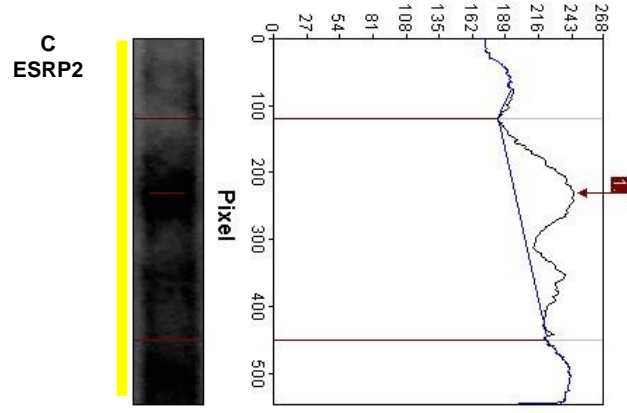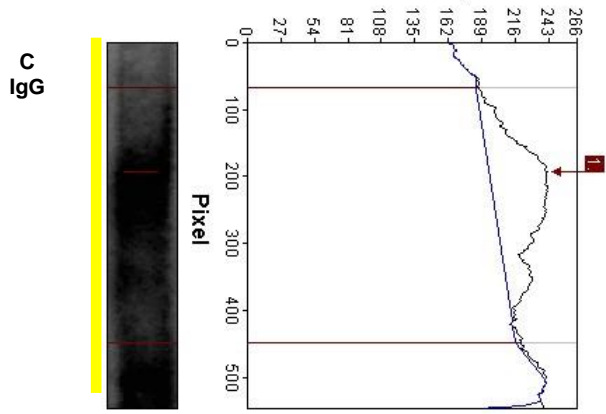

# Source data EMSA / Experiment 3 – densitometry

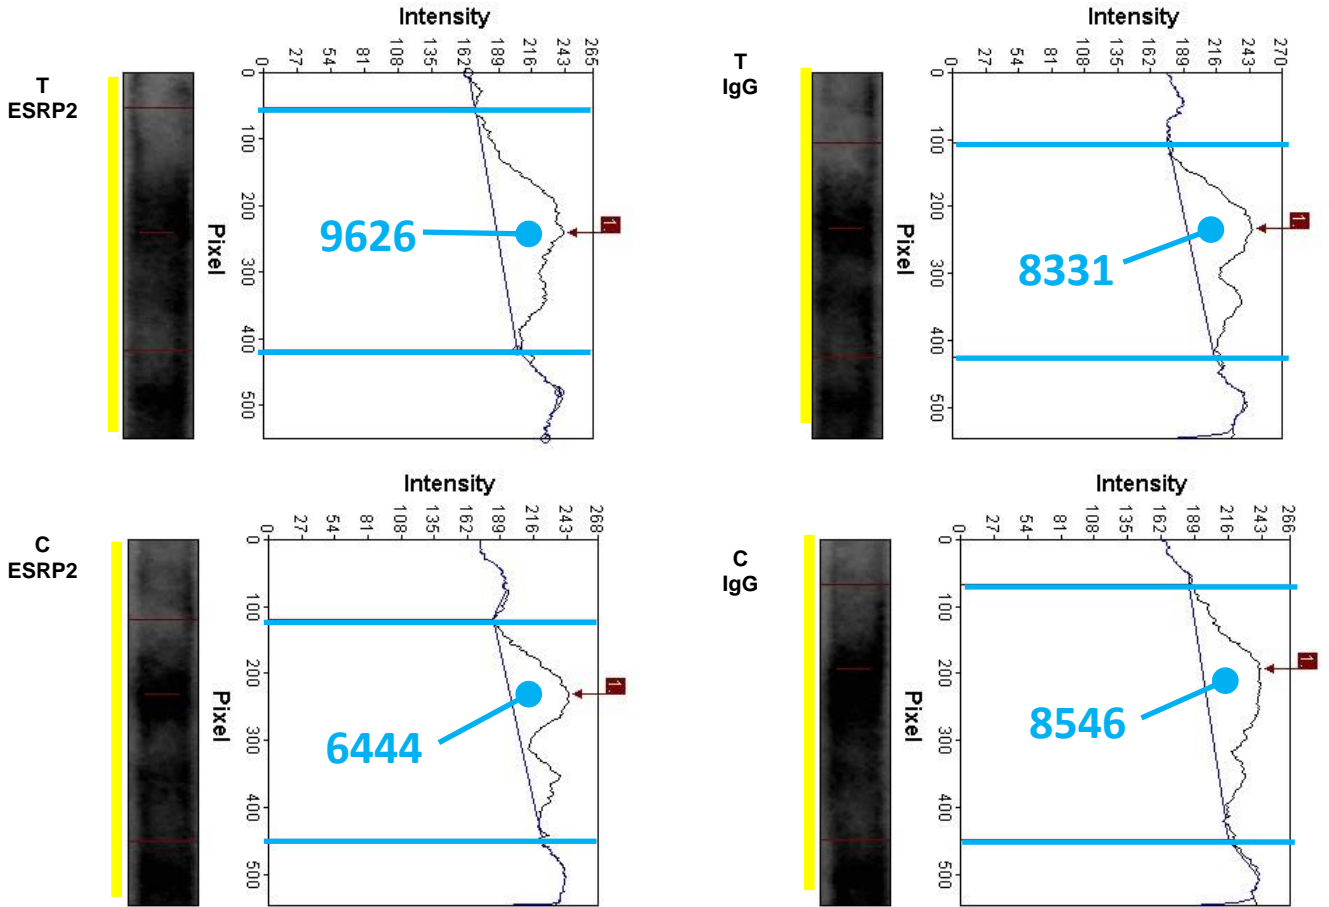

Raw volume was used to estimate ESRP2 bound on EMSA probes rs152731-T and rs152731-C. Signal intensity of the corresponding IgG lane was normalized to 100 %:

|            | anti-ESRP2-Ab | IgG  |
|------------|---------------|------|
| rs152731-T | 115%          | 100% |
| rs152731-C | 75%           | 100% |

# Source data EMSA / *Experiment 4 – uncurated data*

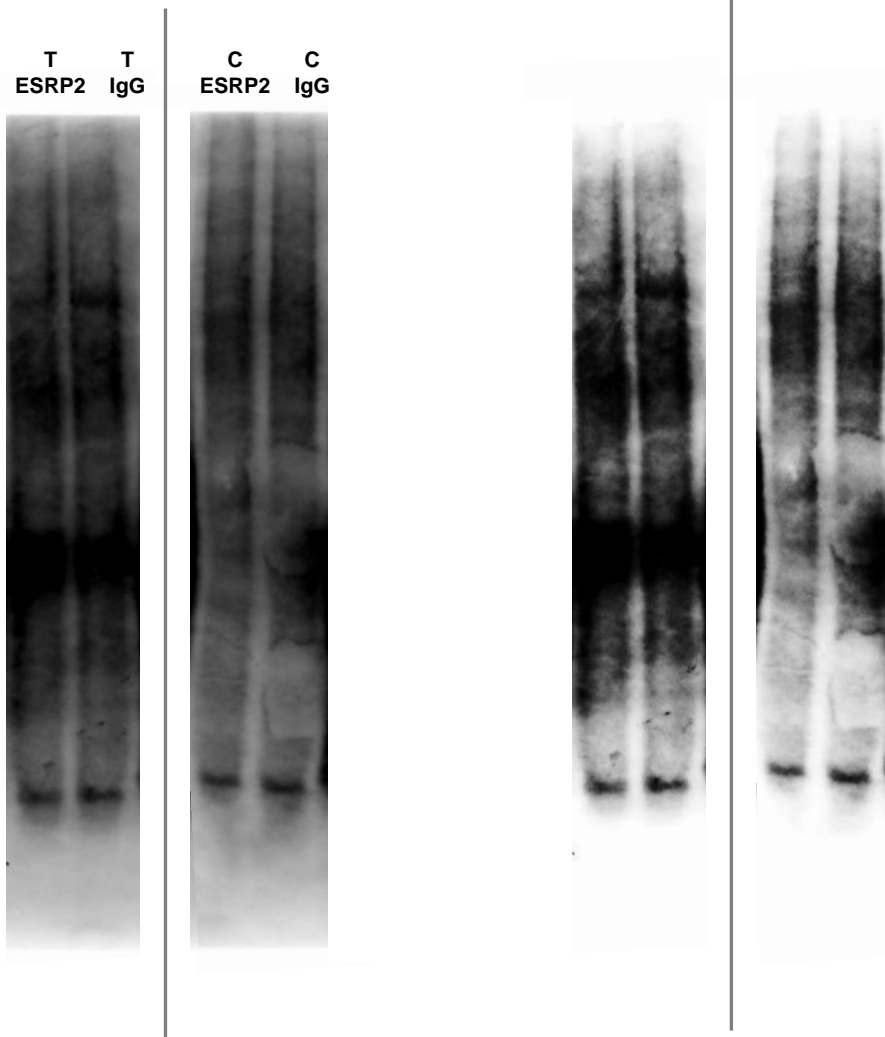

*raw data*

*brightness and contrast adjusted  
for visualisation on screen*

## **Legend:**

EMSA Probe (rs152731 allele C or rs152731 allele T)  
Ab (ESRP2 = anti-ESRP2-Ab; IgG = isotype control)

# Source data EMSA / Experiment 4 – lane profiles

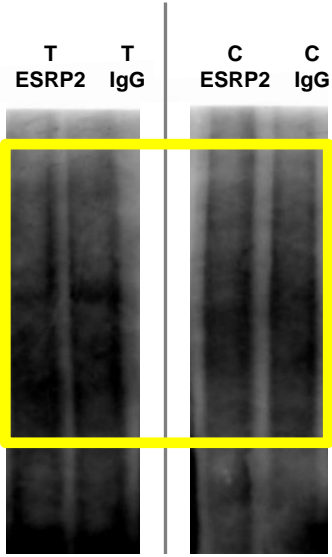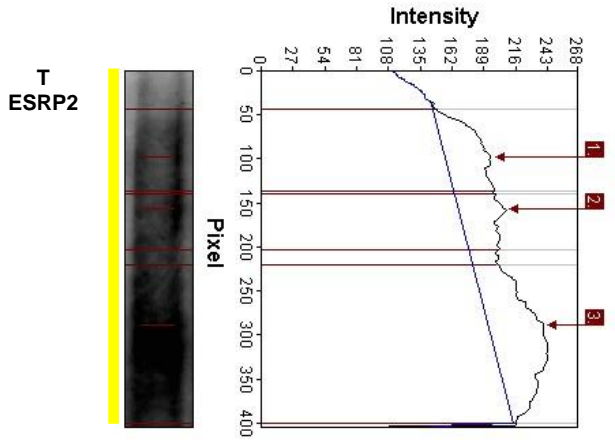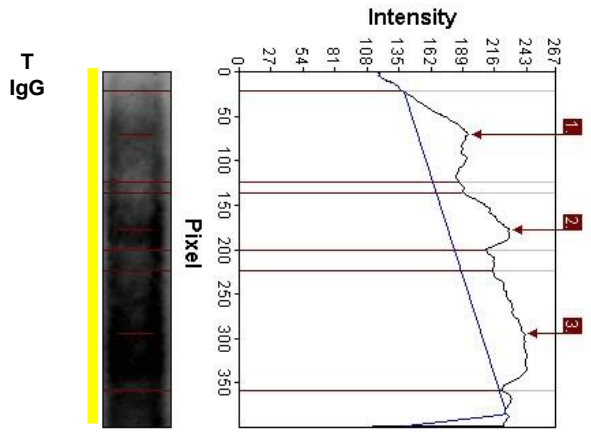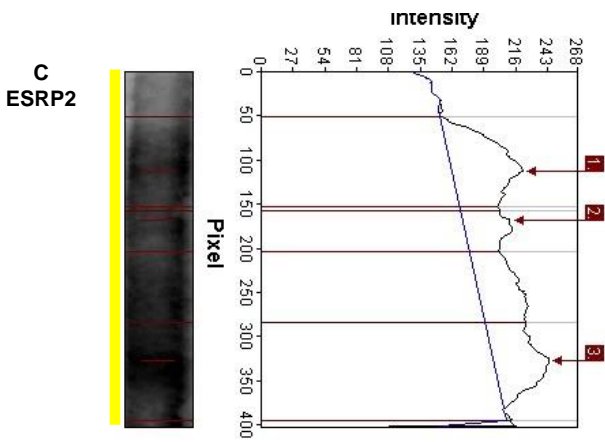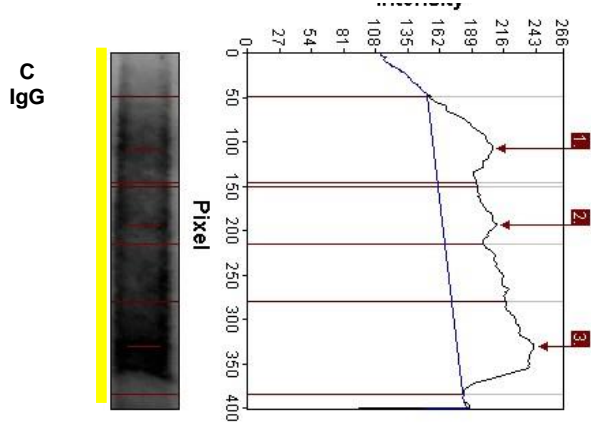

# Source data EMSA / Experiment 4 – densitometry

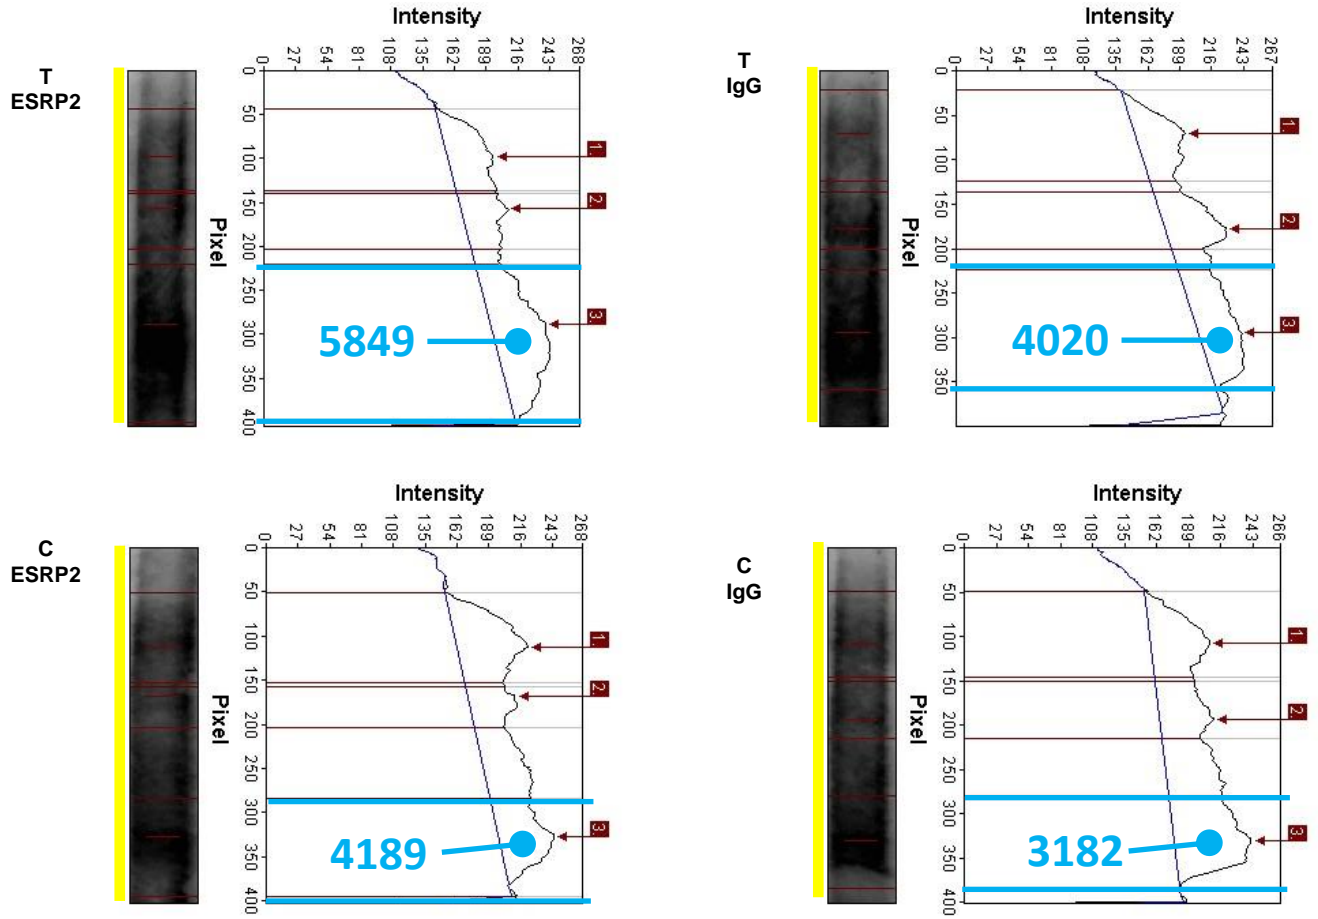

Raw volume was used to estimate ESRP2 bound on EMSA probes rs152731-T and rs152731-C. Signal intensity of the corresponding IgG lane was normalized to 100%:

|            | anti-ESRP2-Ab | IgG  |
|------------|---------------|------|
| rs152731-T | 145%          | 100% |
| rs152731-C | 131%          | 100% |



# Source data EMSA / *Experiment 5 – uncurated data*

C      T      T  
ESRP2   ESRP2   IgG

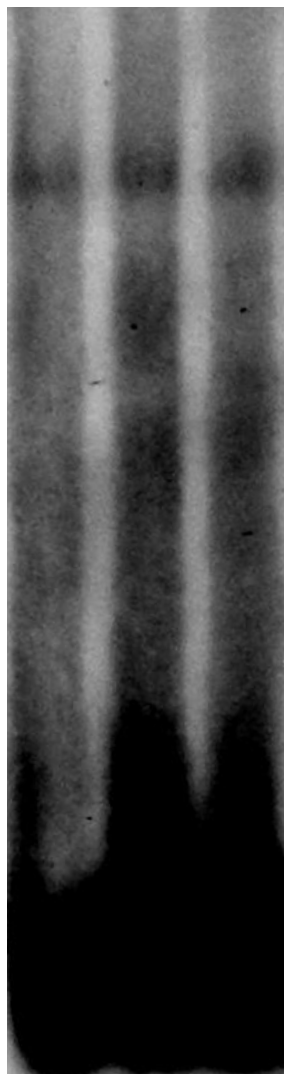

*raw data  
30 min exposure*

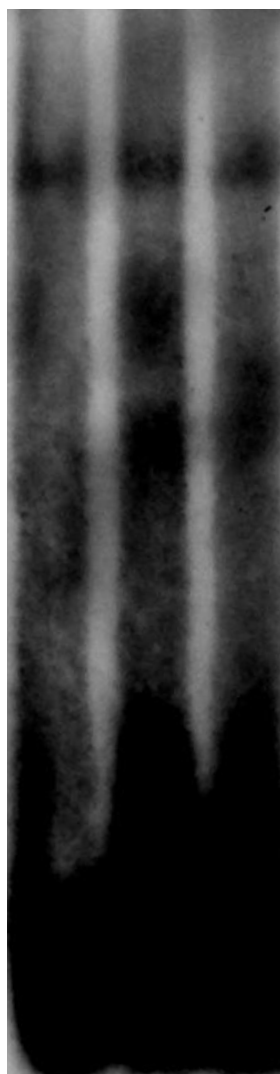

*raw data  
60 min exposure*

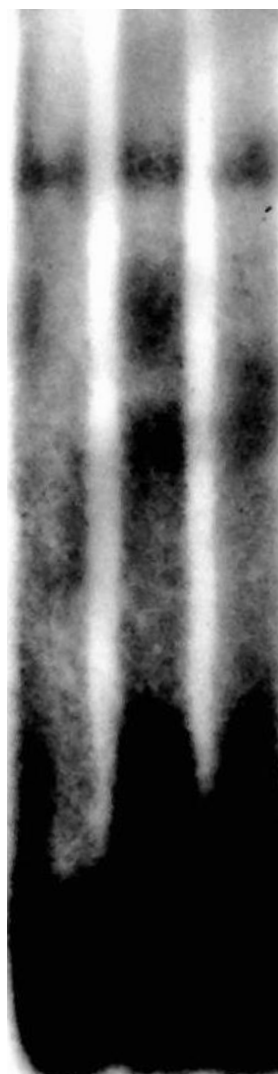

*brightness and contrast adjusted  
for visualisation on screen*

## **Legend:**

EMSA Probe (rs152731 allele C or rs152731 allele T)  
Ab (ESRP2 = anti-ESRP2-Ab; IgG = isotype control)

# Source data EMSA / Experiment 5 – lane profiles

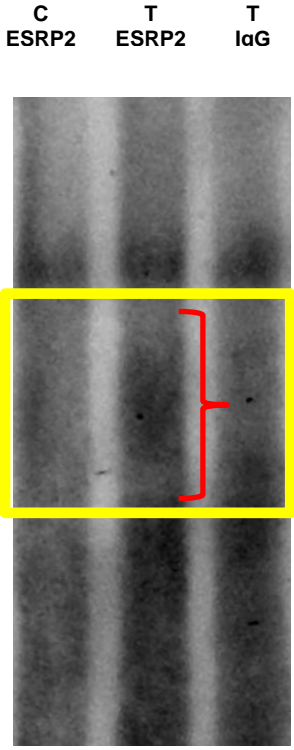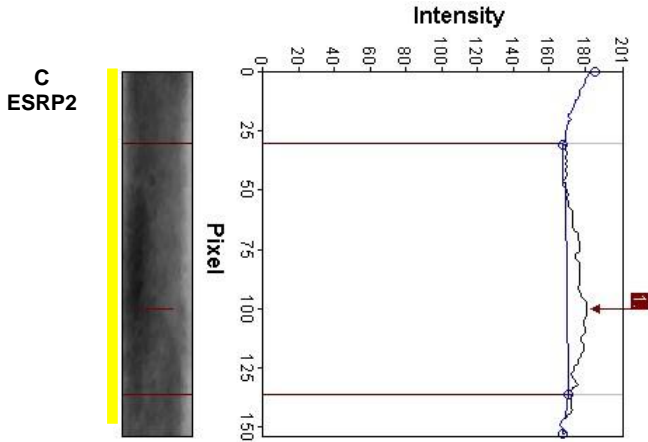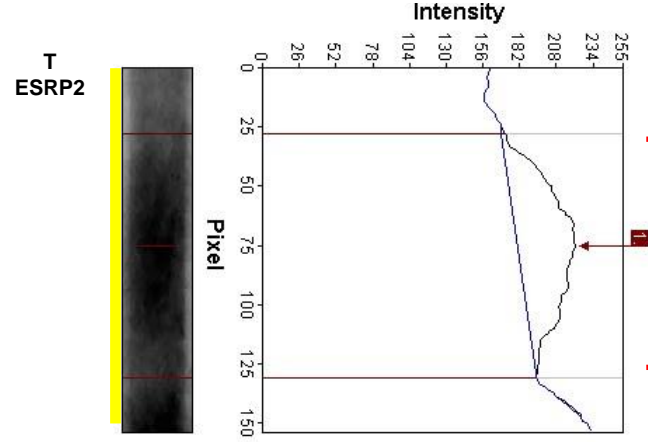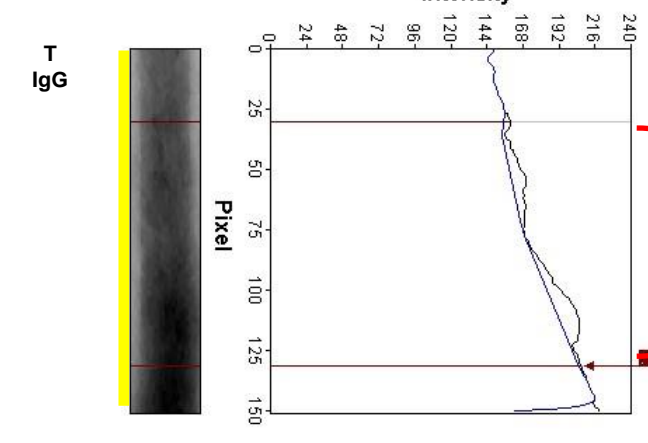

*present in T ESRP2 but absent in T IgG*

# Source data EMSA / Experiment 5 – densitometry

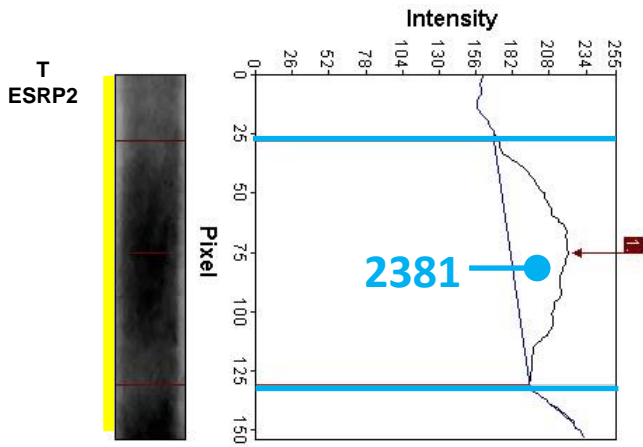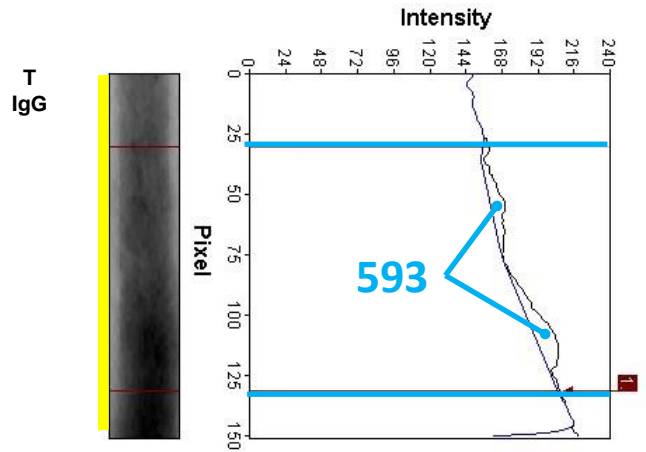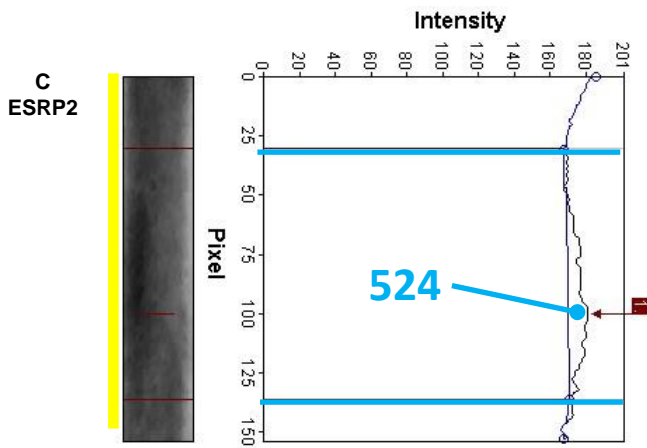

Raw volume was used to estimate ESRP2 bound on EMSA probes rs152731-T and rs152731-C. Signal intensity of the IgG lane was normalized to 100 %:

|            | anti-ESRP2-Ab | IgG  |
|------------|---------------|------|
| rs152731-T | 401%          | 100% |
| rs152731-C | 88%           | 100% |

# Source data EMSA / *Experiment 6 – uncurated data*

C      C      T      T  
ESRP2 IgG ESRP2 IgG

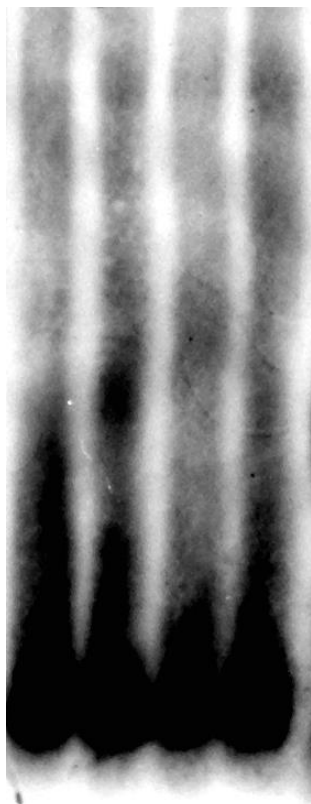

*raw data  
20 min exposure*

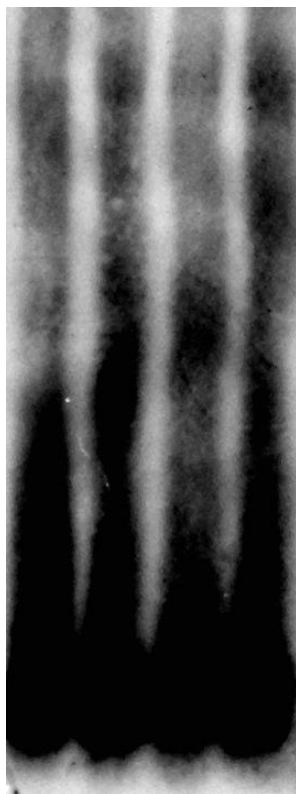

*raw data  
40 min exposure*

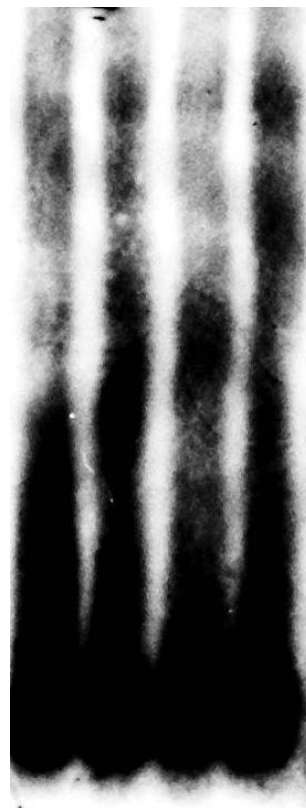

*brightness and contrast  
adjusted for visualisation  
on screen*

## **Legend:**

EMSA Probe (rs152731 allele C or rs152731 allele T)  
Ab (ESRP2 = anti-ESRP2-Ab; IgG = isotype control)

# Source data EMSA / Experiment 6 – lane profiles

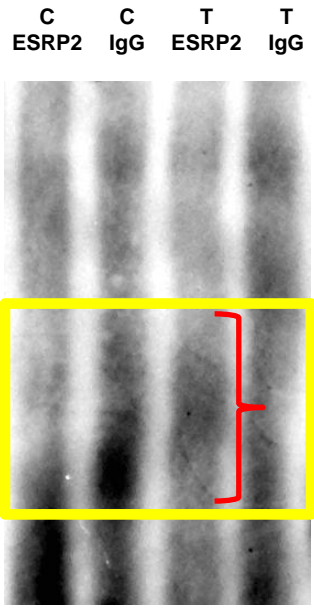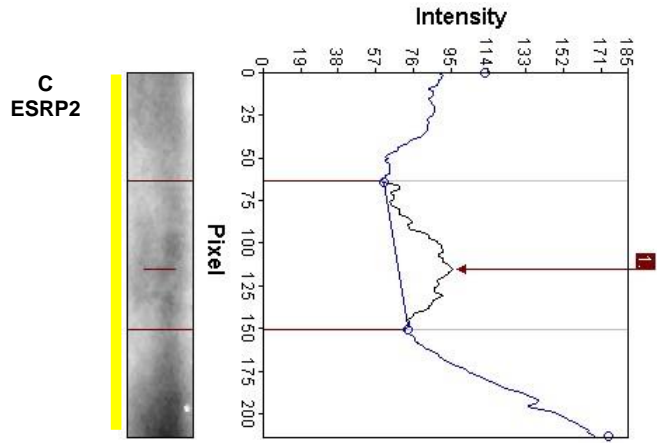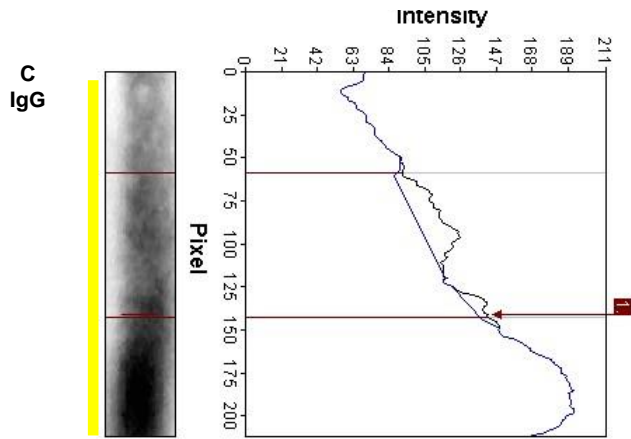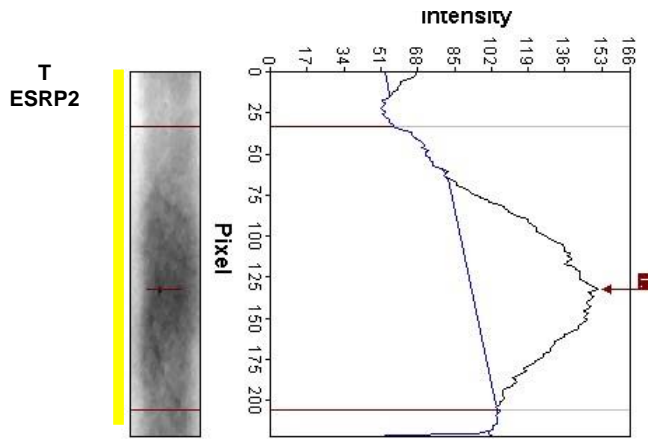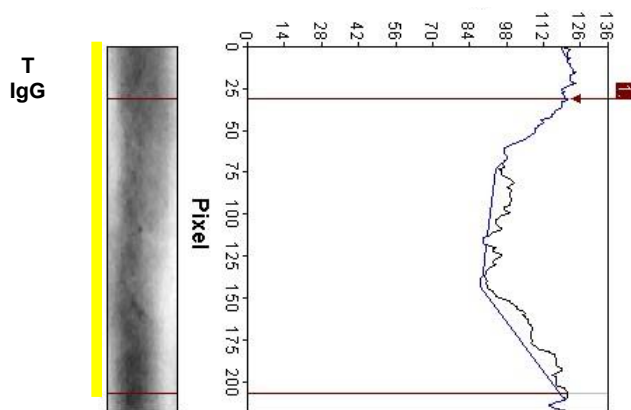

present in T ESRP2 but absent in T IgG

# Source data EMSA / Experiment 6 – densitometry

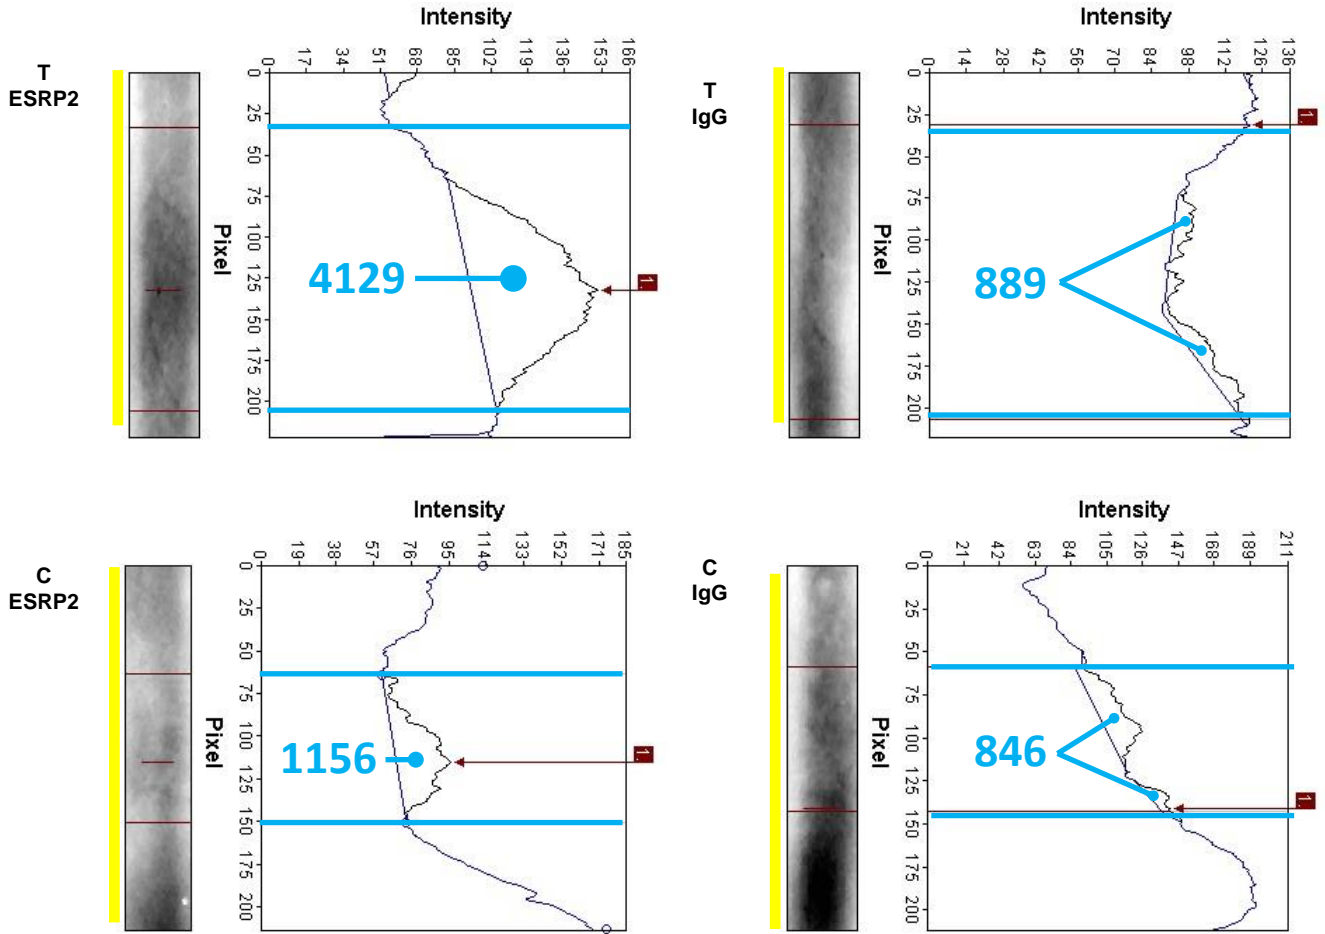

Raw volume was used to estimate ESRP2 bound on EMSA probes rs152731-T and rs152731-C. Signal intensity of the corresponding IgG lane was normalized to 100%:

|            | anti-ESRP2-Ab | IgG  |
|------------|---------------|------|
| rs152731-T | 464%          | 100% |
| rs152731-C | 137%          | 100% |

# Source data co-IP / Figure 6C,D

C

EMSA Probe:  
rs152731 allele  
IP  
Elu.

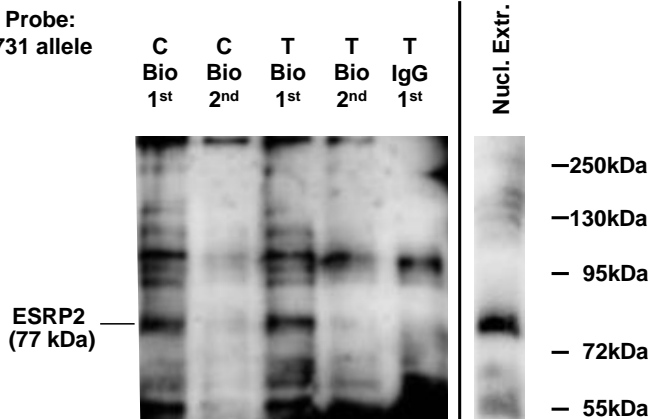

Raw data 6C is from: Experiment 2,  
exposure 10 min (co-IP) | 30 sec (nuclear extract)

D

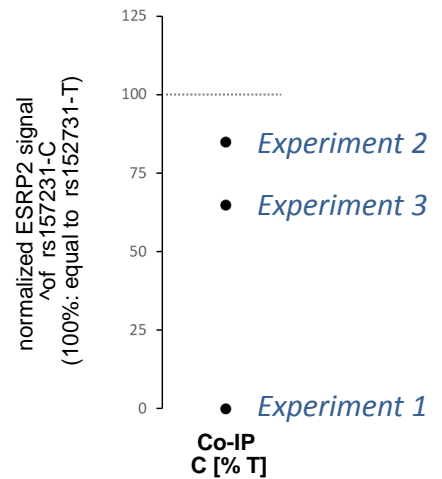

Nuclear extracts used in experiment 1, 2 and 3 were from T84.

Dokumentation of primary data (GLP rules, Hannover medical school):

Experiment 1: Lab Book 7452,

pages 48-50 (Immunoprecipitation)

pages 54-57 (ESRP2 detection)

Experiment 2: Lab Book 7452,

pages 62-64 (Immunoprecipitation)

pages 68-72 (ESRP2 detection)

Experiment 3: Lab Book 7452,

pages 84-86 (Immunoprecipitation)

pages 89-92 (ESRP2 detection)



# Source data co-IP / *Experiment 1 – uncurated data*

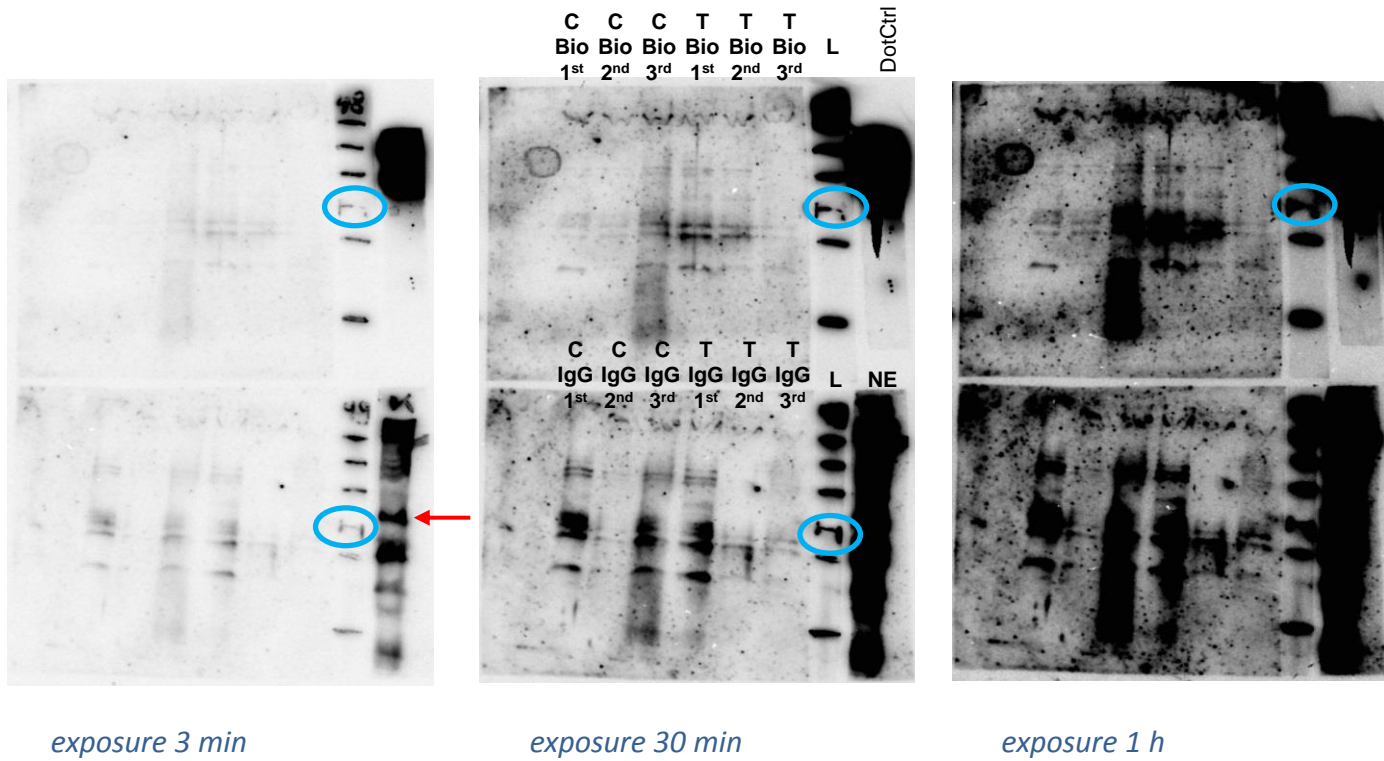

## Legend:

EMSA Probe (rs152731 allele C or rs152731 allele T)

Ab for IP (Bio = anti-biotin-Ab; IgG = isotype control)

Eluate (1st, 2nd, 3rd)

**L = Ladder** ; band sizes are: 36 kDa, 55 kDa, 72 kDa, 95 kDa, 130 kDa, 250 kDa;  
72 kDa is encircled in blue

**NE = T84 nuclear extract**, expected size of ESRP2 = 77 kDa (marked by red arrow)

DotCtrl = Dot Control; set of 10 fold dilution of biotinylated probe developed in parallel



Source data co-IP / *Experiment 1 – ESRP2 in co-IP (red box)*

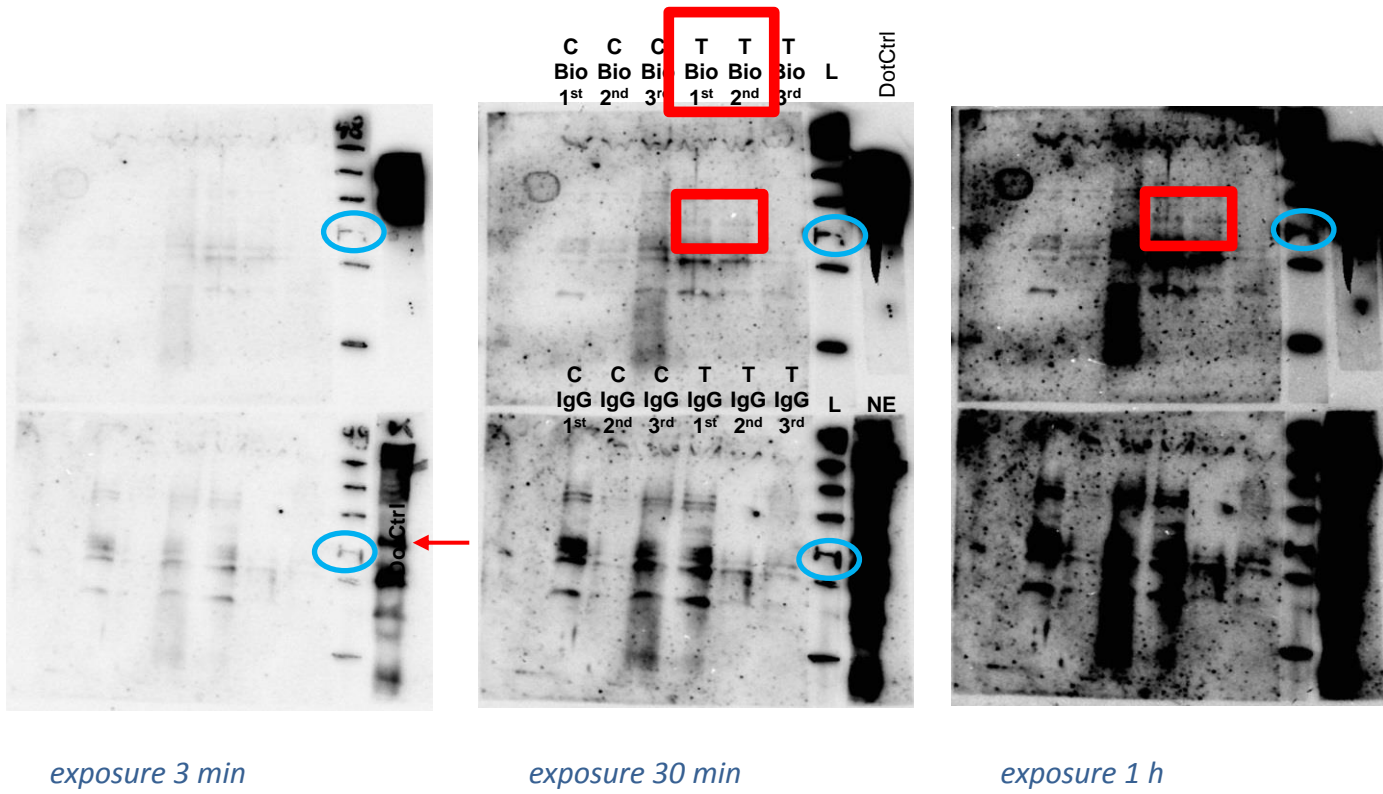

*As no immunoreactive signal from samples with EMSA Probe rs152731 allele C was observed, experiment 1 was not evaluated by densitometry.*

# Source data co-IP / *Experiment 2 – uncurated data*

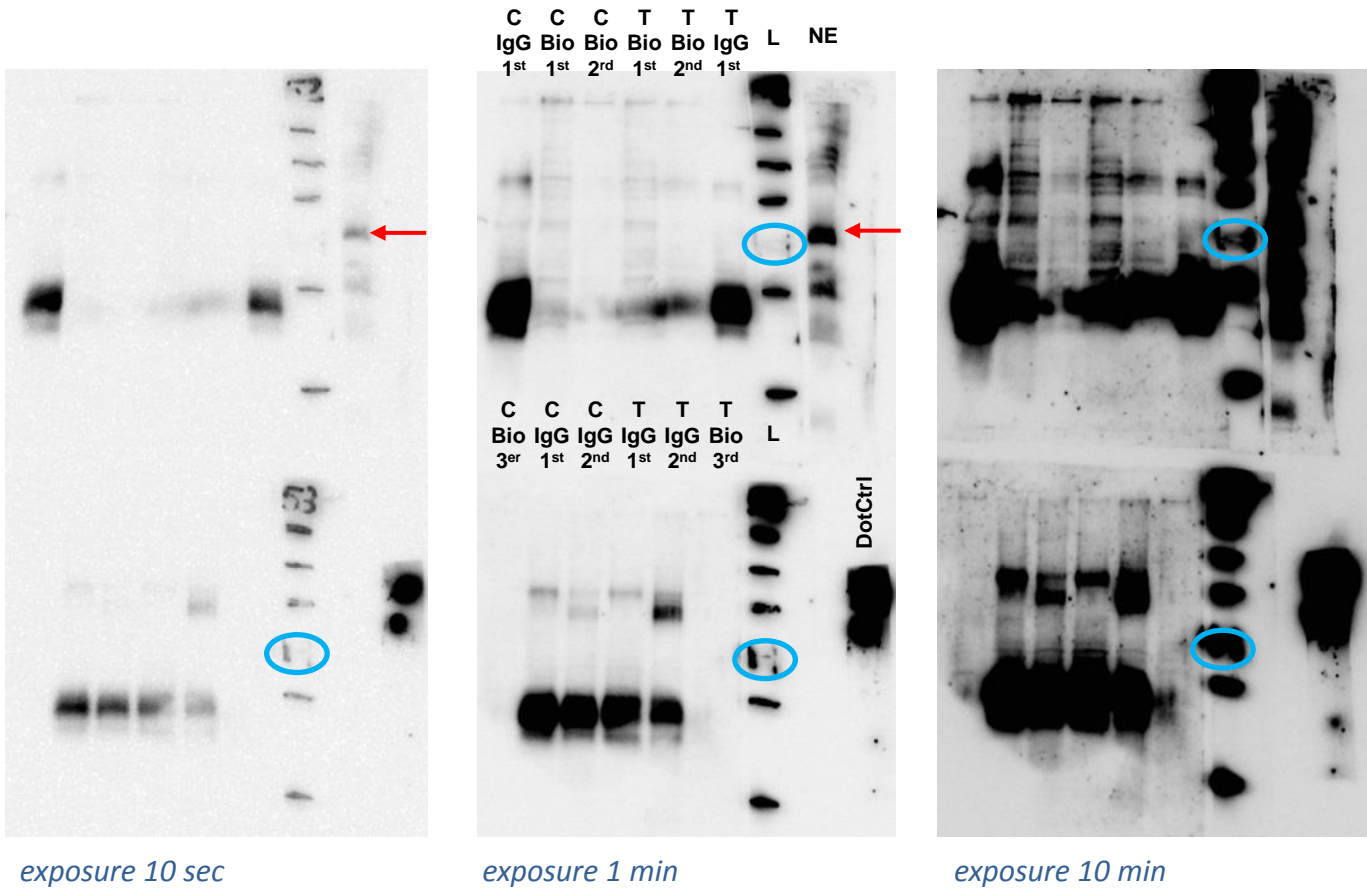

## Legend:

EMSA Probe (rs152731 allele C or rs152731 allele T)

Ab for IP (Bio = anti-biotin-Ab; IgG = isotype control)

Eluate (1st, 2nd, 3rd)

**L = Ladder** ; band sizes are: 36 kDa, 55 kDa, 72 kDa, 95 kDa, 130 kDa, 250 kDa;  
 72 kDa is encircled in blue

**NE = T84 nuclear extract**, expected size of ESRP2 = 77 kDa (marked by red arrow)

DotCtrl = Dot Control; set of 10 fold dilution of biotinylated probe developed in parallel

Source data co-IP / *Experiment 2 – ESRP2 in co-IP (red box)*

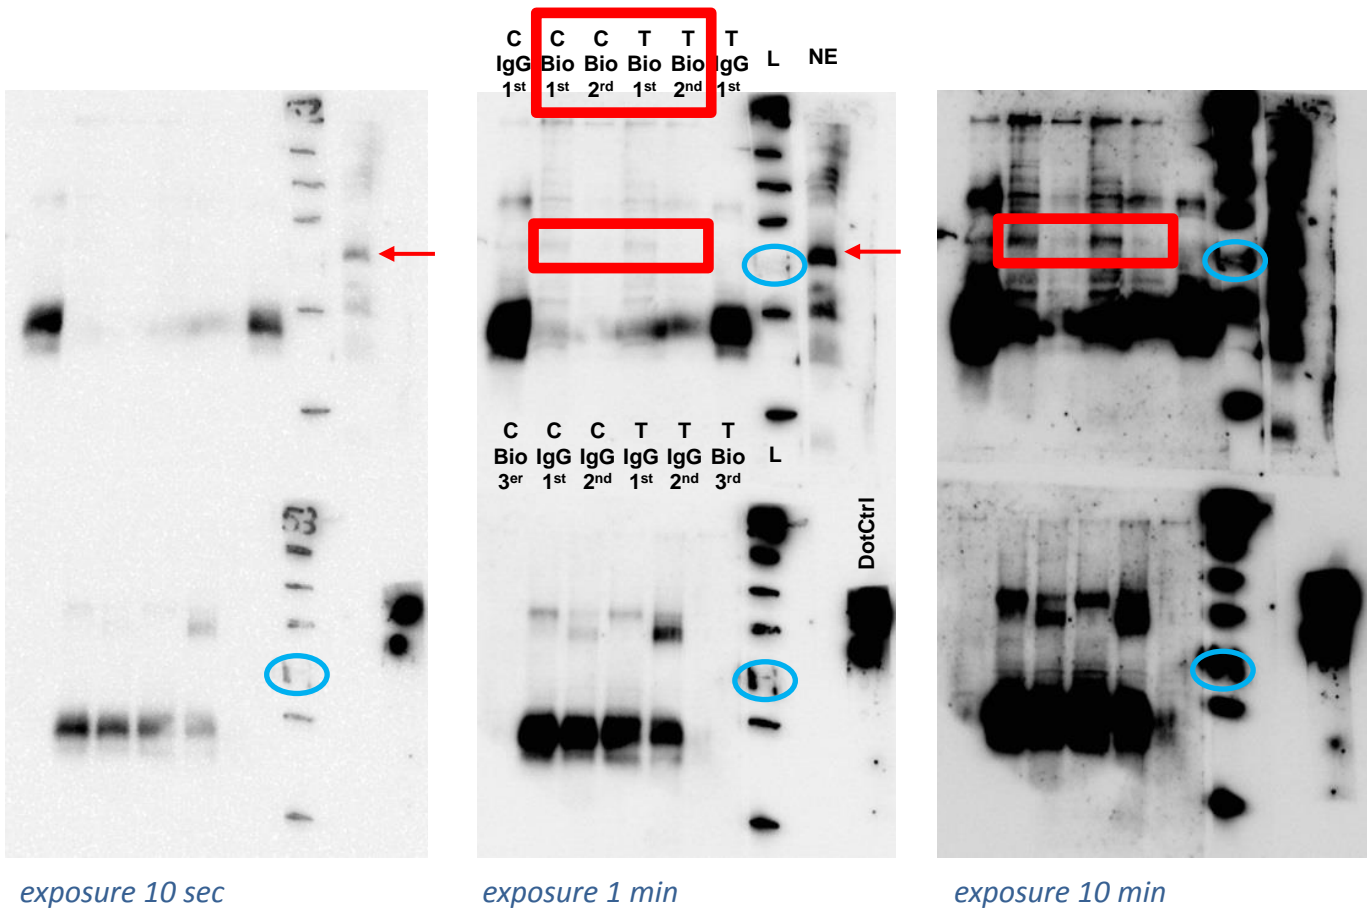

Figure 6C:

EMSA Probe:  
rs152731 allele  
IP  
Elu.

C C T T T  
Bio Bio Bio Bio IgG  
1st 2nd 1st 2nd 1st

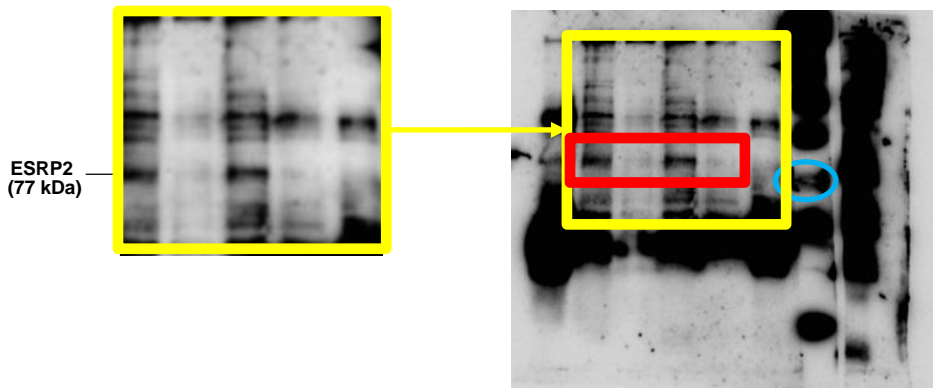

# Source data co-IP / Experiment 2 - densitometry

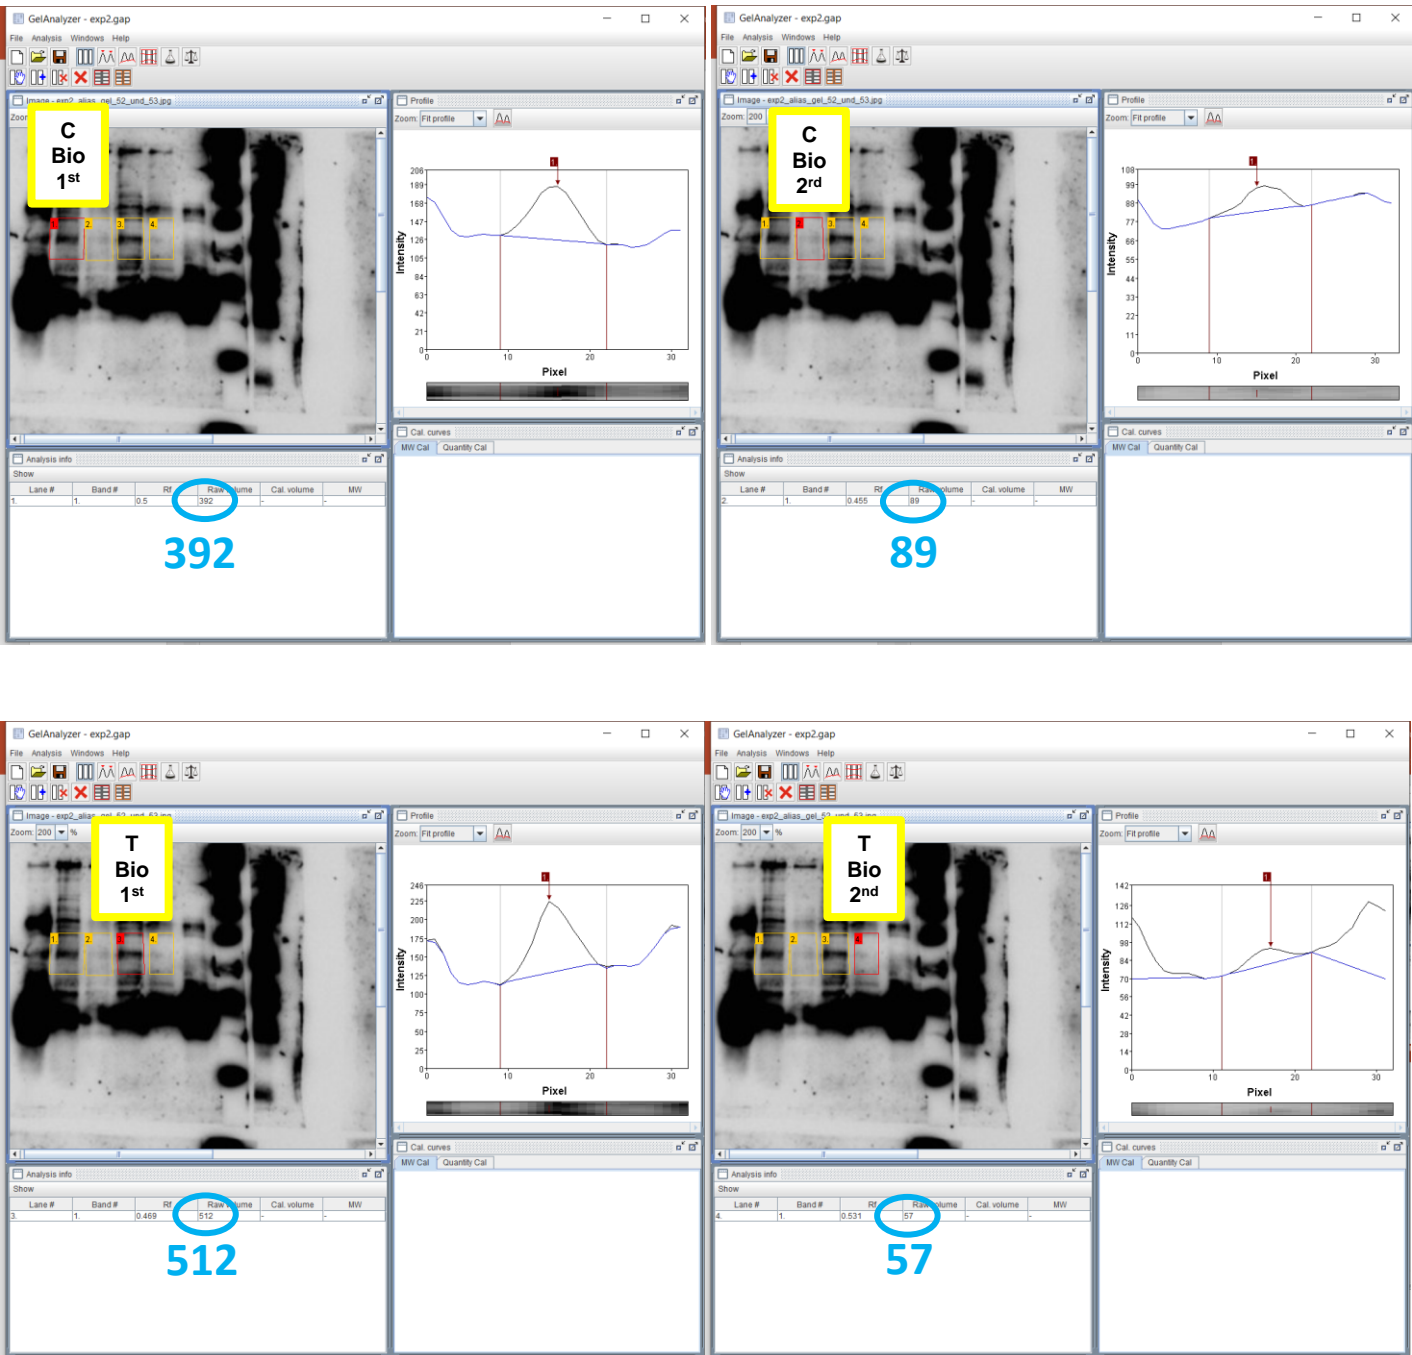

Raw volume, summarized from 1st and 2nd eluate, was used to estimate ESRP2 bound on EMSA probes.

Signal intensity of ESRP2 immunoreactive signal on EMSA Probe rs152731 allele C, expressed as % of signal intensity of ESRP2 immunoreactive signal on EMSA Probe rs152731 allele T: 85%

Software used for analysis:

GelAnalyzer 2010a ([www.gelanalyzer.com](http://www.gelanalyzer.com)) by Istvan Lazar Jr., PhD and Istvan Lazar Sr., PhD, CSC

# Source data co-IP / *Experiment 3 - uncurated data*

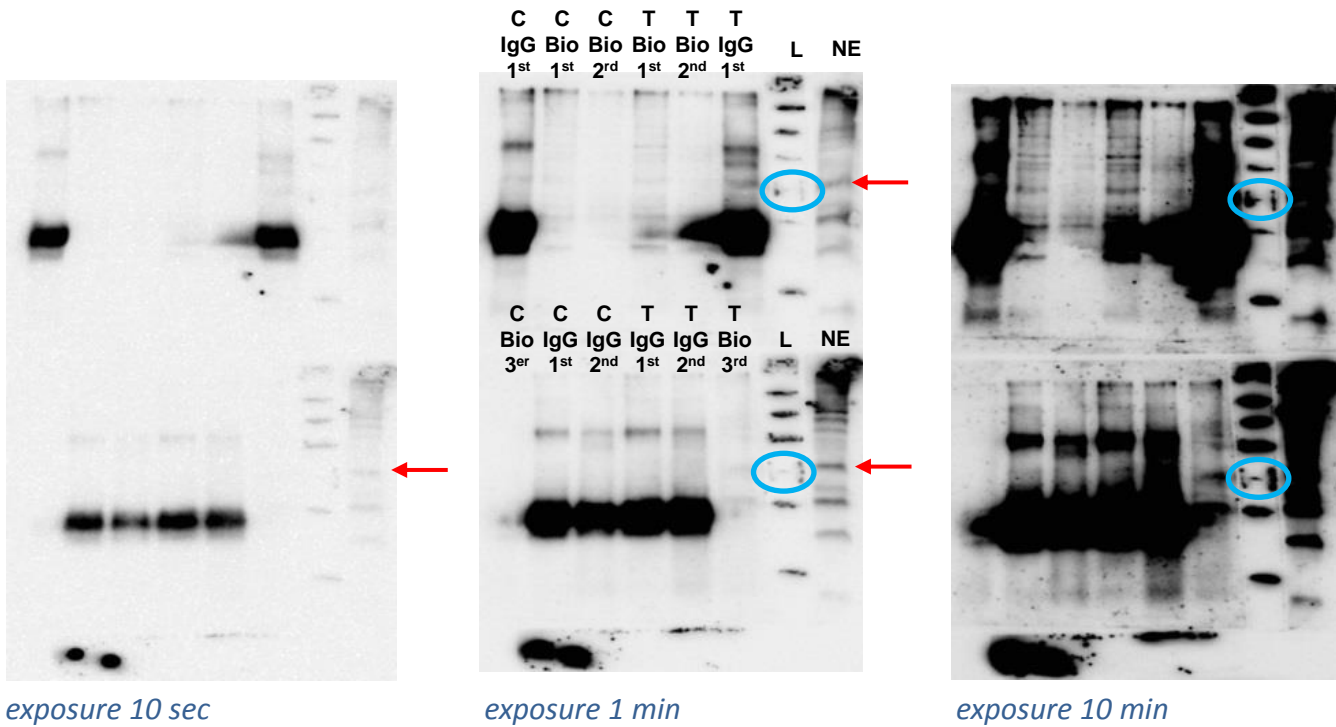

## Legend:

EMSA Probe (rs152731 allele C or rs152731 allele T)

Ab for IP (Bio = anti-biotin-Ab; IgG = isotype control)

Eluate (1st, 2nd, 3rd)

**L = Ladder** ; band sizes are: 36 kDa, 55 kDa, 72 kDa, 95 kDa, 130 kDa, 250 kDa;  
72 kDa is encircled in blue

**NE = T84 nuclear extract**, expected size of ESRP2 = 77 kDa (marked by red arrow)

Source data co-IP / *Experiment 3 – ESRP2 in co-IP (red box)*

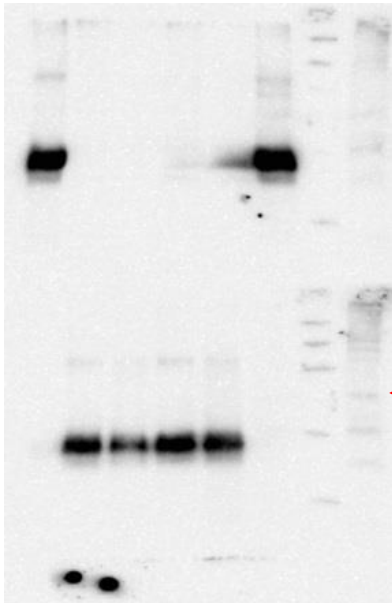

*exposure 10 sec*

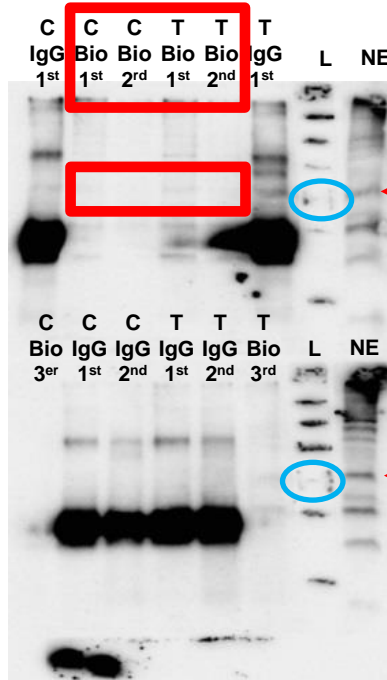

*exposure 1 min*

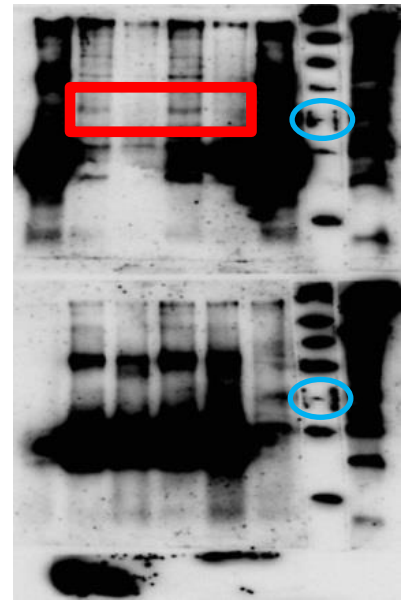

*exposure 10 min*



# Source data co-IP / *Experiment 3 - densitometry*

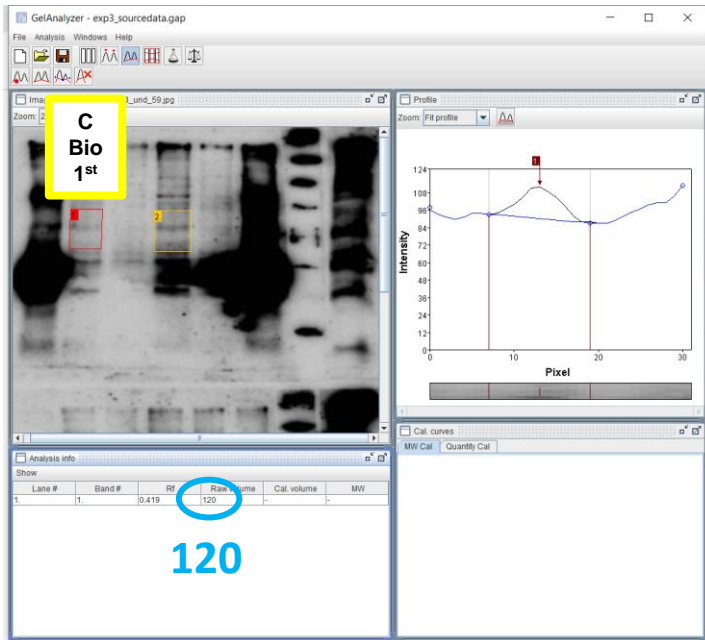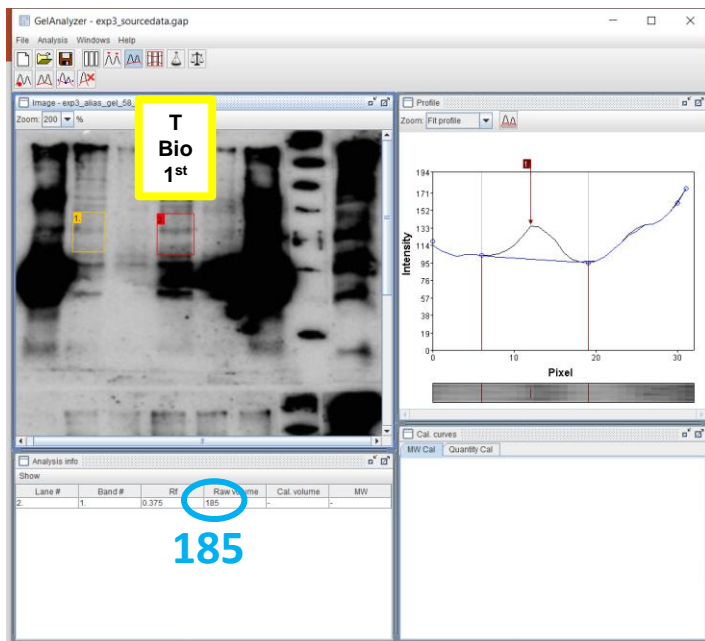

Raw volume was used to estimate ESRP2 bound on EMSA probes.

Signal intensity of ESRP2 immunoreactive signal on EMSA Probe rs152731 allele C, expressed as % of signal intensity of ESRP2 immunoreactive signal on EMSA Probe rs152731 allele T: 65%

Software used for analysis:

GelAnalyzer 2010a ([www.gelanalyzer.com](http://www.gelanalyzer.com)) by Istvan Lazar Jr., PhD and Istvan Lazar Sr., PhD, CSC
